# Supplementary material for: An Unbiased Molecular Approach Using 3′-UTRs Resolves the Avian Family-Level Tree of Life
Source: PubMed Central journal article supplement (PMC7783168; doi:10.1093/molbev/msaa191), 2020-11-08
Supplement: msaa191_supplementary_data.pdf [file msaa191_supplementary_data.pdf]

## Supplementary Information

# An Unbiased Molecular Approach Using 3'-UTRs Resolves the Avian Family-Level Tree of Life

Kuhl H<sup>1,2,3</sup>, Frankl-Vilches C<sup>1</sup>, Bakker A<sup>1</sup>, Mayr G<sup>4</sup>, Nikolaus G<sup>1</sup>, Boerno ST<sup>2</sup>, Klages S<sup>2</sup>, Timmermann B<sup>2</sup>, Gahr M<sup>1</sup>.

1: Max Planck Institute for Ornithology, Dept. Behavioural Neurobiology, Seewiesen, Germany; 2: Max Planck Institute for Molecular Genetics, Sequencing Core facility, Berlin, Germany; 3: Leibniz-Institute of Freshwater Ecology and Inland Fisheries, Dept. Ecophysiology and Aquaculture, Berlin, Germany. 4: Senckenberg Research Institute, Ornithological Section, Frankfurt am Main, Germany

|                                                |            |
|------------------------------------------------|------------|
| <b>1. Supplementary Figures - Legends</b>      | page 2-5   |
| <b>2. Supplementary Tables - Legends</b>       | page 6-7   |
| <b>3. Supplementary Results and Discussion</b> | page 8 -12 |
| <b>4. Supplementary Figures</b>                | page 13-20 |
| <b>5. Supplementary Tables</b>                 | page 21-42 |

## 24 **Supplementary Figure legends:**

25

26 **Fig. S1:** The steps used to combine transcriptomic and genomic assemblies into multiple alignments  
27 for phylogenetic analysis.

28

29 **Fig. S2:** Transcriptome size of various tissues (A) and the effect of gap filters (gappiness) on tissue  
30 specific transcriptome sizes (B). In **A** we show that the transcriptome sizes and the resulting amount  
31 of non-coding 3'-UTR sequences (blue) and of CDS (coding) sequences (red) differed between tissue  
32 types. Brain samples resulted in the largest transcriptomes and blood samples in the smallest  
33 transcriptomes based on the amount of alignable sequence in the reference genome (depicted is the  
34 median and error of the median of nucleotides aligned to the canary reference genome). For each  
35 tissue type, the fraction of nucleotides aligned to CDS or 3'-UTR was similar, i.e. was not tissue type  
36 specific. Miscellaneous tissue types were named "body"; these tissues were neither brain nor blood  
37 and mainly represent the museum specimens. The numbers on the columns represent the sample size  
38 per tissue (Tab. S2). Statistical comparison (ANOVA followed by Tukey HSD,  $p = 0.001$ ,  $F(5, 299)$   
39  $= 30.14$ ; see Tab. S2D for data) showed that the transcriptome sizes of brain tissue were similar to  
40 skin but differed from all other tissues and that blood, skin, liver and muscle derived transcriptomes  
41 were similar (tissue types with the same letter are not significantly different). However, note the small  
42 number of skin tissues. In **B**, we depict that the application of gap filters (gappiness) of around 100  
43 missing nucleotides per reference nucleotide (dashed circle) normalizes the size of the used  
44 transcriptomes. Shown are the mean numbers of aligned nucleotides per tissue for 3'-UTRs; "all" is  
45 the combined aligned transcriptome of all tissues. Essentially, the gappiness criteria removes  
46 nucleotides from the multiple alignment that are aligned in only few samples due to differences in  
47 transcriptome sequencing quality and tissue specific or species specific expression. Statistical  
48 comparison (ANOVA followed by Tukey HSD,  $p < 0.0001$ ,  $F(4, 282) = 7.2317$ ; see Tab. S2E for data)  
49 showed that the transcriptome sizes resulting of gap filtering (gappiness 100) of each tissue-specific  
50 transcriptome were similar for blood, brain, liver and muscle. Only those of "body" differed from the  
51 other tissues due to a few smaller transcriptomes. Thus, transcriptomes derived of blood are as good  
52 as those derived from other organs for phylogenetic procedures.

53

54 **Fig. S3.** GTR bioinformatics evolutionary model was the best model independent of sequence type.  
55 The GTR evolutionary model performed best for the majority of the 10 kbp chunks of the 3'-UTR  
56 data. In case of CDS (coding) data, SYM and GTR-F models performed similar, while independent  
57 calculations using GTR-F or SYM models resulted in the same tree topology. For testing, the

58 concatenated alignments were split into 10 kbp chunks to perform iqtree model tests on each chunk.  
 59 Abbreviations: GTR = generalized time-reversible model, Tavaré, 1986; SYM = symmetrical model,  
 60 Zharkikh, 1994. All models are described in <http://www.iqtree.org/doc/Substitution-Models>.

61

62 **Fig. S4:** Phylogenetic trees derived from coding sequences (CODON, **A**), coding sequences with the  
 63 3<sup>rd</sup> nucleotide removed from the codons (CODON12, **B**), amino acid sequences (AAS, **C**), all  
 64 calculated with a concatenated bioinformatics procedure, and a noncoding sequence tree (3'-UTR,  
 65 **D**) calculated with a coalescent bioinformatics procedure. The color code refers to the higher-level  
 66 clades identified in the 3'-UTR concatenated tree (Fig. 2): blue = Australaves; green = Higher  
 67 Landbirds; red = Aquatic & Semiaquatic Birds; yellow = Basal Landbirds; grey = Mirandornithes;  
 68 light blue = Galloanserae; brown = Palaeognathae. Note that the higher-level taxa of Fig. 2 are mixed  
 69 up in A-D. Furthermore, the number and composition of higher-level clades of A-D vary. Note that  
 70 the families of the order Caprimulgiformes (\*) are split into two non-related taxa in the CODON tree  
 71 (A). The Falconiformes (#) are moved away from the Australaves in A-C and are fused to some (B)  
 72 or all (C) other orders of birds of prey. However, in the CODON12 tree (B) the Cariamiformes are  
 73 now sister to Accipitriformes, but not the Falconiformes as in the 3'-UTR concatenated tree of Fig. 2  
 74 or as suggested previously (e.g. Suh et al., 2011). Orders with more than one species were collapsed  
 75 to one branch. Branch lengths of the trees are not scaled to facilitate illustration.

76

77 **Fig. S5:** The difference of our 3'-UTR tree as compared to the “Jarvis” tree (which combined coding  
 78 and noncoding sequences) is due to sequence type and taxa sampling. Depicted are phylogenetic trees  
 79 derived from noncoding sequences (3'-UTR) using different amounts of taxa or tree calculations and  
 80 collapsed to the taxa included in the Jarvis tree (Jarvis et al., 2014). In **A** we show that the 3'-UTR  
 81 tree differs from the Jarvis-tree even if we consider only those 50 species (taxa) represented in the  
 82 Jarvis-tree. This is possibly due to differences in type of data. In **B**, we increased the number of taxa  
 83 to 96 by adding taxa that were most closely related to the taxa used by Jarvis et al. (in most cases  
 84 transcriptomes of the very same genus were added to the calculation). This resulted in a tree most  
 85 similar to the Jarvis tree and shows that restrictions of data types and amount may possibly be  
 86 compensated by biological replicates of species used for the tree calculation. In **C**, we increased the  
 87 number of taxa to 121 by adding those taxa, which had the most basal split in each order. This already  
 88 resulted in a topology very similar to our final topology (D) and shows the importance taxon  
 89 sampling. In **D** we included all 429 species plus some biological replicates (452 samples). [!] indicates  
 90 differences of these 3'-UTR trees (A-D) as compared to the Jarvis-tree that was calculated based on  
 91 a mixture of coding and noncoding sequences. Of the 50 taxa represented in the Jarvis tree, most

92 differences with our tree concern the relationships of owls among the Higher Landbirds, of the taxa  
 93 of the Basal Landbirds, and of the basal position of the Mirandornithes among the Neoaves (see Fig.  
 94 2).

95 **Fig. S6:** A species-level phylogeny of birds (429 species of 379 genera) based on 3'-UTR sequences  
 96 including all (106) non-passerine and most (115) passerine family-level taxa. Each species is  
 97 represented by one species, listed as the species name, followed by the family name and the order  
 98 name. The higher-level clades are color-coded as in Fig. 2 (right column). The suborder Passeri  
 99 (oscines or songbirds) of the Passeriformes is subdivided into ten oscine-higher clades (OHC1 to  
 100 OHC10). The intrafamily relationships of the Fringillidae (#) and the Paridae (\$) have been studied  
 101 in some detail and fit to previous assumptions. The questionable split of the Cettiidae and  
 102 Scotocercidae into separate families is indicated (\*). For all genera represented with two or more  
 103 species, such species were correctly assigned to the expected genus. In a number of cases, species  
 104 were represented by both transcriptomes and genomes (see Tab. S1). The tree was calculated by  
 105 RAxML-ng using a large concatenated alignment of 3'-UTR residues as input (2,584,785 analyzable  
 106 patterns, maximum 100 or 110 missing taxa (gappiness). Approximate likelihood-based measures of  
 107 branch support delivered maximal values (SH-aLRT = 100) except those shown in red (for 110-  
 108 gappiness) and blue (for 100-gappiness). SH-aLRT values are considered as quite conservative. In  
 109 case of SH-aLRT values below 100, we also provide support values from IQTREE2 ultrafast  
 110 bootstrapping (UFBS, green values). In the few cases where SH-aLRT support was below 80 (two for  
 111 110-gappiness; seven for 100-gappiness), the UFBS approach still reached good values of support in  
 112 the range of 86 – 99. Note that the entire backbone of the phylogenetic tree had maximal support  
 113 (SH-aLRT and UFBS = 100) values. The timing of the divergence nodes was calculated by DPPDiv  
 114 as detailed in the methods Error bars are confidence intervals (95%). Time scale and divergence times  
 115 are in Million years ago. Diagonal bars indicate the part of the tree that is not scaled in order to reduce  
 116 the size of the tree and PDF.

117 **Fig. S7:** The pattern of transcription factor binding site motifs (TFBS) of a 3'-UTR differs in genus-  
 118 specific manner within the family Spheniscidae (penguins). The 3'-UTRs of the gene EMC1 of seven  
 119 species of three genera of penguins are depicted schematically. The presence of TFBS in that 3'-UTR  
 120 shows a family-specific signature in all species (A) as well genus-specific signatures for each of the  
 121 three genera, the *Aptenodytes* (B), the *Eudyptes* (C) and the *Pygoscelis* (D). The combinatorial pattern  
 122 of the TFBS distinguished the genera. TFBS that occur in all or several species are aligned above the  
 123 black line, those that occur in only one species are listed below the black line.



124

125 **Fig. S8:** Vocal production learning evolved three times during avian evolution, (1.) in hummingbirds  
126 (Fam. Trochilidae) nested deeply in the Caprimulgiformes, (2.) in the ancestor of parrots and thus is  
127 present in the three parrot families of the Psittaciformes, and (3.) in the ancestor of the oscine  
128 passerines, the songbirds, and thus is present throughout the songbird families but absent in suboscine  
129 passerine families. The thickness and redness of the branches are proportional to the posterior  
130 probability of having a change-point assessed by TreeBreaker algorithm, a Bayesian inference  
131 calculation method. This analysis indicates that the alternative model is supported, i.e., the  
132 distribution of vocal production learning at the tips of the branches is different under those clades as  
133 compared to the null model of no association. Turquoise dots label family-level taxa with vocal  
134 production learning (Tab. S5), green dots those that lack vocal production learning (detailed  
135 information about song without mentioning vocal learning), and dark blue dots those of which  
136 information concerning singing and vocal production learning is widely missing. The phylogenetic  
137 tree used for the calculations is the 3'-UTR family-level tree (Fig. 3A & 3B). The diagonal bar  
138 indicates that this part of the family-level tree of avian life is not scaled.

## 139 **Supplementary Tables**

140

141 **Tab. S1:** List of species, family-level tax, order-level taxa and the source of tissues, transcriptomes  
142 and genomes.

143

144 **Tab. S2:** Quality of transcriptome and genome assemblies included in the present study using  
145 `idba_tran` or `idba_ud`, respectively. **(A)** shows basic features of the transcriptomes generated by us,  
146 **(B)** of the publically available transcriptomes, and **(C)** of the genomes generated by us. **(D)** shows  
147 statistical analysis (ANOVA followed by Tukey HSD test) of basic transcriptome features (consensus  
148 length, N50 transcript length, number of assembled transcripts). The complexity of transcriptomes  
149 (i.e. number of genes) was verified by BUSCO and alignment with the reference genome to estimate  
150 the amount of uniquely alignable CDS and 3'-UTR sequence (A, B). The same statistics were  
151 calculated for draft genome assemblies (C), but neglecting the BUSCO scoring, as BUSCO does not  
152 work well on highly fragmented genome assemblies. **(E)** shows the transcriptome length after gap  
153 filtering for various levels of gappiness (number of allowed missing samples) for the various tissues.  
154 Statistical analysis (ANOVA followed by Tukey HSD test) showed that only “body” differs  
155 significantly from the other tissues due to a few species for which gappiness resulted in smaller  
156 transcriptomes; statistics shown is for 100 missing samples (gappiness 100).

157

158 **Tab. S3:** List of species **(A)** and genes **(B)** used for the analysis of transcription factor binding site  
159 motifs (TFBS) of 3'-UTRs (see Fig. 1D).

160

161 **Tab. S4:** Comparison of fossil data and divergence times of family-level taxa as estimated by the  
162 UGR (uncorrected gamma-distributed rate model). We considered well-documented and temporally  
163 well constrained fossils, which represent either crown- or stem-group representatives of certain  
164 clades. Molecular data are taken from Fig. S6. For fossils, whose age is determined as a time range,  
165 we calculated the minimal and the maximal differences between fossil and molecular age. From these  
166 values, we calculated the mean difference between molecular and fossil data as being  $9.4 \pm 8.8$  My  
167 (minimal; mean  $\pm$  SD) and  $10.7 \pm 9.5$  My (maximum; mean  $\pm$  SD), respectively. For simplicity, we  
168 did not consider confidence intervals of the molecular-dated clades.

169

170 **Tab. S5:** List of songbird family-level taxa with at least one species reported to show vocal production  
171 learning, as indicated by mimicry, experimental evidence or dialect formation (see Fig. S8).

172

173 **Tab. S6:** List of species with anatomical evidence for the presence of the song control system of  
174 oscine passerine family-level taxa.

175

176

177

178

179

## 180 **Supplementary Results and Discussion**

181

### 182 **The avian family-level tree of life.**

183 The interrelationships of the family-level taxa of Clade 1, the Palaeognathae (Fig. 3A) agree with the  
 184 phylogeny of Prum (Prum et al., 2015). The ostriches are the sister group of all other palaeognath  
 185 birds and the volant tinamous (Tinamidae) are nested within the clade. The South-American tinamous  
 186 are the sister group of the Australian cassowaries and emus (Casuariidae). These relationships differ  
 187 from those reported on basis of conserved noncoding elements and a coalescent inference procedure,  
 188 in which the rheas are sister to the cassowaries, emus and kiwis (Sackton et al., 2019). The differences  
 189 are due to the tree inference procedure. The divergence time (58 Mya) of the ostriches (Struthionidae)  
 190 from the tinamous (Tinamidae), rheas (Rheidae) and cassowaries (Casuariidae), as well the  
 191 divergence times of the rheas, tinamous, and cassowaries (51-45 Mya) are earlier than previously  
 192 suggested (Prum et al., 2015), which matters for the scenario of evolution of flightlessness of  
 193 palaeognath species (see Supplementary discussion)

194 The interrelationships within Clade 2, the Galloanserae (Fig. 3A), which include the  
 195 Galliformes (landfowl) and Anseriformes (waterfowl), are also in concordance with previous  
 196 analyses (Hackett et al., 2008; Prum et al., 2015). The South American screamers (Anhimidae) are  
 197 the sister group of all other Anseriformes. Among the Galliformes, the megapodes (Megapodiidae)  
 198 are the sister group of all other species.

199 For the Neoaves (Clades 3-7; Fig. 3A), the relationships of the included taxa are partially  
 200 already described in the main part of the paper. Thus, for Clade 4 we refer entirely to the main paper.

201 Clade 5 (Fig. 3A) of our phylogeny comprises the Aquatic & Semiaquatic Birds, which fall  
 202 into two subclades. One subclade includes most seabirds (Fig. 3A, Clade 5B) (Gaviiformes,  
 203 Sphenisciformes, Procellariiformes, Suliformes, Pelecaniformes) as well as storks (Ciconiiformes).  
 204 The other subclade (Fig. 3A, Clade 5A) comprises the tropicbirds (Phaethontiformes), and the kagu  
 205 and sunbittern (Eurypygiiformes). Clade 5 corresponds with the clade “Core waterbirds” of the Jarvis  
 206 et al (2014) tree - although the latter does not include Ciconiiformes, which were not included in the  
 207 study - but differs entirely in its composition from the waterbird clade recovered in Prum’s phylogeny  
 208 (Prum et al., 2015). In that clade, Prum’s phylogeny combines the Charadriiformes, the  
 209 Mirandornithes, and those orders making-up our Aquatic & Semiaquatic Birds clade. A sister group  
 210 relationship between storks and the seabird clade has been suggested before (Kuramoto et al., 2015).

211 In Clade 6 (Fig. 3A), the Higher Landbirds, the hawks, eagles, and the new world vultures  
 212 (order Accipitriformes) (Fig. 3A) are the sister group of an assemblage of seven orders (Fig. 3A), the  
 213 owls (Strigiformes), mousebirds (Coliiformes), cuckoo rollers (Leptosomiformes), trogons

214 (Trogoniformes), hornbills (Bucerotiformes), rollers and allies (Coraciiformes) and the woodpeckers  
 215 and allies (order Piciformes). This Higher Landbirds confirm to the Afroaves clade of Jarvis et al  
 216 (2014), while the included orders were subdivided into two (Prum et al., 2015) or three (Hackett et  
 217 al., 2008) higher-level clades in other studies.

218 Clade 7 (Fig. 3B) consists of the Australaves (Suh et al., 2011; Hackett et al., 2008) that  
 219 include the seriemas (Cariamiformes), the falcons (Falconiformes), the parrots (Psittaciformes) and  
 220 the passerines (Passeriformes), which is consistent with previous phylogenetic results (Hackett et al.,  
 221 2008; Suh et al., 2011, Jarvis et al., 2014; Prum et al., 2015). However, some family relationships of  
 222 oscine passerines are different in our 3'-UTR tree as compared to previous trees (e.g. Prum et al.,  
 223 2015; Oliveros et al., 2019), as discussed in more detail below.

224

225 In the Passeriformes, the 92-107 studied (the count depending on the classification, see Methods)  
 226 family-level taxa of songbirds (suborder Passeri [or oscine passerines] of the Passeriformes) fall into  
 227 ten higher-level oscine clades (OHC) (Fig. 3B; Fig. S6). The basal OHC1 (Fig. 3B) represents the  
 228 lyrebirds (Menuridae); OHC2 (Fig.3B) the Australian treecreepers and bowerbirds (Climacteridae  
 229 and Ptilonorhynchidae); OHC3 (Fig.3B) unites the Fairy-wrens, the honeyeaters, pardalotes and  
 230 Australian “warblers” (Maluridae, Meliphagidae, Pardalotidae and Acanthizidae); OHC4 (Fig.3B)  
 231 are the Australo-Papuan babblers and longrunners (Pomatostomidae and Orthonychidae); OHC5 (Fig.  
 232 3B) comprises most of the families formerly summarized as parvorder Corvida (Sibley and Ahlquist,  
 233 1991; Barker et al., 2004); OHC6 (Fig. 3B) are the satinbirds (Cnemophilidae); OHC7 (Fig.3) are the  
 234 berrypeckers and longbills (Melanocharitidae); OHC8 (Fig. 3B) are the Australo-Papuan robins, the  
 235 African rockfowl and rockjumpers (Petroicidae, Picathartidae, and Chaetopidae) [OHC6-OHC8 were  
 236 formerly grouped loosely as transitional oscines]; and the evolutionarily youngest taxa OHC9-  
 237 OHC10 include most taxa previously summarized as the Passerida (Sibley and Ahlquist, 1991; Barker  
 238 et al., 2004). OHC9 (Fig. 3B) comprises the Sylvioidea and Paroidea. OHC10A (Fig. 3) consists of  
 239 the Muscicapoidea, Sittoidea, and Regulidae. OHC10B (Fig. 3B) assembles the Passeroidea including  
 240 the nine-primaried oscines (a polyphyletic group), the Dicaeoidea, Promeropidae, and  
 241 Bombycilloidea, as well as one taxon previously not assigned to the Passerida, the Chloropsidae.

242 The present phylogeny differs widely from all previous ones in the composition of oscine  
 243 higher-level clades and the interrelationships of the family-level taxa within these clades (e.g. Barker  
 244 et al., 2004; Aggerbeck et al., 2014) with the exception of the recent study of Oliveros et al (2019),  
 245 which was based on ultra-conserved molecular elements. Since the Oliveros-tree of oscine families  
 246 and that part of our tree are very similar, these trees might converge on the true phylogeny of songbird  
 247 families. The small differences between the passerine part of the present tree and the Oliveros-tree

248 might be due to the use of different genera. The strong differences to other passerine trees (e.g. Barker  
249 et al., 2004; Jetz et al., 2012; Aggerbeck et al., 2014; Claramunt and Cracraft, 2015) are likely due to  
250 their lower sampling of families, the overall number of sequences analysed, and/or the use of  
251 mitochondrial and nuclear coding sequences. The future addition of further genera, in particular of  
252 the corvid relationship (OHC5) shall solve the ambiguities between the Oliveros-tree and the  
253 presented tree.

254 The missing oscine families might affect the relationships of some families within the OHCs  
255 described above. In particular, the lack of the scrubbird family (Atrichornithidae) is unfortunate since  
256 it is likely the sister group of the lyrebirds (OHC1) (Chesser and ten Have, 2007). However, most  
257 missing families are expected to fall within either the Corvida assemblage (OHC5) or the Passerida  
258 assemblage (OHC9-OHC10). Thus, the 10% missing families are unlikely to affect the overall  
259 structure of songbird clades (OHCs), which is quite similar to the one of Oliveros et al (2019). Of 21  
260 recently defined songbird family-level taxa, our data confirm the split of previous families in fifteen  
261 cases. The split of the previous Timaliidae into Pellorneidae, Leiotrichidae and Timaliidae may be  
262 questioned, since these three families are each other's closest relatives (Fig. 3B & Fig. S6).  
263 Furthermore, our data strongly suggest the removal of the genus *Hylia* from the Scotocercidae into  
264 their own family, the Hylidae (Bates, 1930; Fregin et al., 2012), but do not support the Cettiidae  
265 being its own (IOU) family, separate from the Scotocercidae (Fig S6). Otherwise, either the genus  
266 *Abroscopus* or the genus *Urosphena* of Scotocercidae need to be considered part of the Cettiidae or  
267 the genus *Urosphena* has to be assigned to a separate family-level taxon. Thus, since the  
268 Erythroceridae were recently removed from the Cettiidae (Gill and Donsker, 2017), the split of  
269 Erythroceridae, Scotocercidae and Cettiidae altogether needs reconsideration. The split of the  
270 Thraupidae into several families could not be validated, because material was only available for the  
271 Coerebidae (banana quit), which was assigned as the closest relative of the Thraupidae.

272 On the subfamily level, we studied in some detail the Paridae (tits), the Fringillidae (finches),  
273 and the Estrildidae (waxbills), since these genera-rich families are rather well known. The observed  
274 relationships of the tit species/genera (Paridae) as well as that of finch species/genera (Fringillidae)  
275 matched recently published detailed molecular trees of these families using mitochondrial data  
276 (Zuccon et al., 2012; Johansson et al., 2013). For the Estrildidae, too, in all cases our tree-building  
277 procedure placed the closely related species of the same genus correctly. However, the relationship  
278 of the waxbill genera differed strongly from previous phylogenies (Sorenson et al., 2004; Arnaiz-  
279 Villena et al., 2009; Hooper and Price, 2015), which was based on little sequence information.

280  
281  
282

283 **References**

- 284
- 285 Aggerbeck M, Fjeldsa J, Christidis L, Fabre PH, Jonsson KA. 2014. Resolving deep lineage  
286 divergences in core corvid passerine birds supports a proto-Papuan island origin. *Mol Phylogenet*  
287 *Evol.* 70:272-285.
- 288
- 289 Arnaiz-Villena A, Ruiz-del-Valle V, Gomez-Prieto P, Reguera R, Parga Lozano CH, Serrano-Vela J.  
290 2009. Estrildinae Finches (Aves, Passeriformes) from Africa, South Asia and Australia: a Molecular  
291 Phylogeographic Study. *Open Ornithol J.* 2:29-36.
- 292
- 293 Barker FK, Cibois A, Schikler P, Feinstein J, Cracraft J. 2004. Phylogeny and diversification of the  
294 largest avian radiation. *Proc Natl Acad Sci USA* 101:11040-11045.
- 295
- 296 Bates GL. 1930. Handbook of the birds of West Africa. London: Bale Sons and Danielson.
- 297
- 298 Chesser R, Have J. 2007. On the phylogenetic position of the scrub-birds (Passeriformes: Menurae:  
299 Atrichornithidae) of Australia. *J Ornithol.* 148:471-476.
- 300
- 301 Claramunt S, Cracraft J. 2015. A new time tree reveals Earth history's imprint on the evolution of  
302 modern birds. *Sci Adv* 1:e1501005.
- 303
- 304 Fregin S, Haase M, Olsson U, Alström P. 2012. New insights into family relationships within the  
305 avian superfamily Sylvioidea (Passeriformes) based on seven molecular markers. *BMC Evol Biol.*  
306 12:157.
- 307
- 308 Gill F, Donsker D. 2017. IOC World Bird List (v. 7.3). International Ornithologists' Union (doi:  
309 10.14344/IOC.ML.7.3).
- 310
- 311 Hackett SJ, Kimball RT, Reddy S, Bowie RC, Braun EL, Braun MJ, Chojnowski JL, Cox WA, Han  
312 K-L, Harshman J. 2008. A phylogenomic study of birds reveals their evolutionary history. *Science.*  
313 320:1763-1768.
- 314
- 315 Hooper DM, Price TD. 2015. Rates of karyotypic evolution in Estrildid finches differ between island  
316 and continental clades. *Evol.* 69:890-903.
- 317
- 318 Jarvis ED, Mirarab S, Aberer AJ, Li B, Houde P, Li C, Ho SY, Faircloth BC, Nabholz B, Howard JT,  
319 et al. 2014. Whole-genome analyses resolve early branches in the tree of life of modern birds. *Science.*  
320 346:1320-1331.
- 321
- 322 Jetz W, Thomas GH, Joy JB, Hartmann K, Mooers AO. 2012. The global diversity of birds in space  
323 and time. *Nature.* 491:444.
- 324
- 325 Johansson US, Ekman J, Bowie RC, Halvarsson P, Ohlson JI, Price TD, Ericson PG. 2013. A complete  
326 multilocus species phylogeny of the tits and chickadees. *Mol Phylogenet Evol.* 69:852-860.
- 327
- 328 Kuramoto T, Nishihara H, Watanabe M, Okada N. 2015. Determining the Position of Storks on the  
329 Phylogenetic Tree of Waterbirds by Retroposon Insertion Analysis. *Genome Biol Evol.* 7:3180-3189.
- 330
- 331 Oliveros CH, Field DJ, Ksepka DT, Barker FK, Aleixo A, Andersen MJ, Alstrom P, Benz BW, Braun  
332 EL, Braun MJ, et al. 2019. Earth history and the passerine superradiation. *Proc Natl Acad Sci USA*  
333 116:7916-7925.

- 334  
335 Prum RO, Berv JS, Dornburg A, Field DJ, Townsend JP, Lemmon EM, Lemmon AR. 2015. A  
336 comprehensive phylogeny of birds (Aves) using targeted next-generation DNA sequencing. *Nature*.  
337 526:569-573.  
338
- 339 Sackton TB, Grayson P, Cloutier A, Hu Z, Liu JS, Wheeler NE, Garnder PP, Clarke JA, Baker AJ,  
340 Clamp N, Edwards SV. 2019. Convergent regulatory evolution and loss of flight in paleognathous  
341 birds. *Science* 364:74-78.  
342
- 343 Sibley CG, Ahlquist JE. 1991. *Phylogeny and Classification of the Birds. A Study in Molecular*  
344 *Evolution*: Yale University Press. New Haven and London.  
345
- 346 Sorenson MD, Balakrishnan CN, Payne RB. 2004. Clade-limited colonization in brood parasitic  
347 finches (*Vidua* spp.). *Syst Biol.* 53:140-153.  
348
- 349 Suh A, Paus M, Kiefmann M, Churakov G, Franke FA, Brosius J, Kriegs JO, Schmitz J. 2011.  
350 Mesozoic retroposons reveal parrots as the closest living relatives of passerine birds. *Nature Comm.*  
351 2:443.  
352
- 353 Tavaré S. 1986. Some Probabilistic and Statistical Problems in the Analysis of DNA Sequences. *Lect*  
354 *Math Life Sci.* 17:57–86  
355
- 356 Zharkikh A. 1994. Estimation of evolutionary distances between nucleotide sequences. *J Mol Evol*  
357 39:315-29.  
358
- 359 Zuccon D, Prŷs-Jones R, Rasmussen PC, Ericson PGP. 2012. The phylogenetic relationships and  
360 generic limits of finches (Fringillidae). *Mol Phylogenet Evol.* 62:581-596.



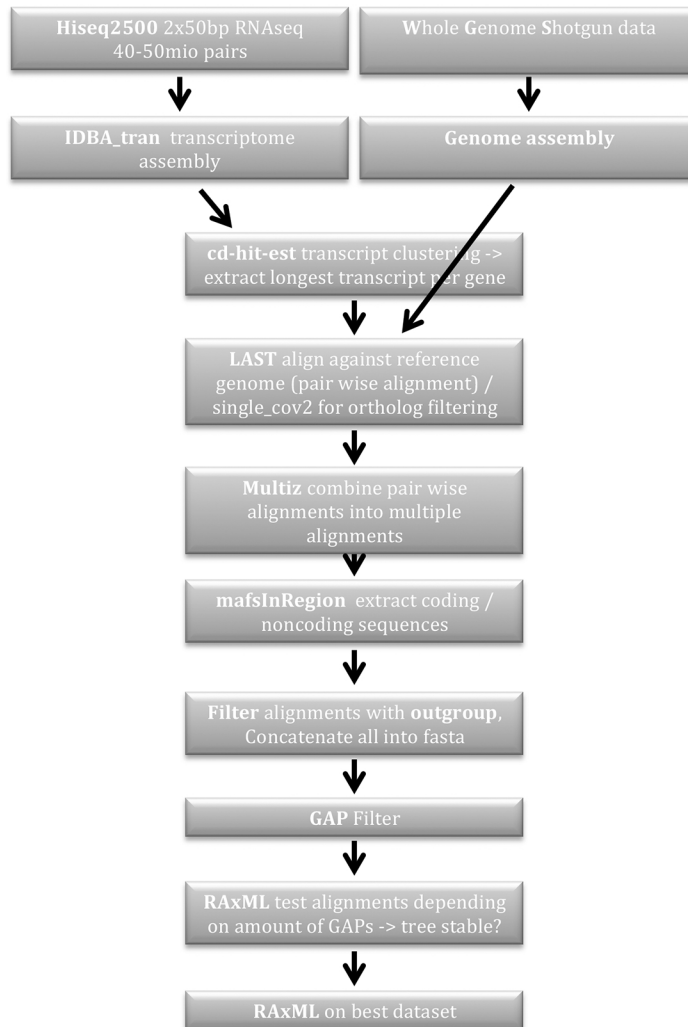

**Fig. S1**

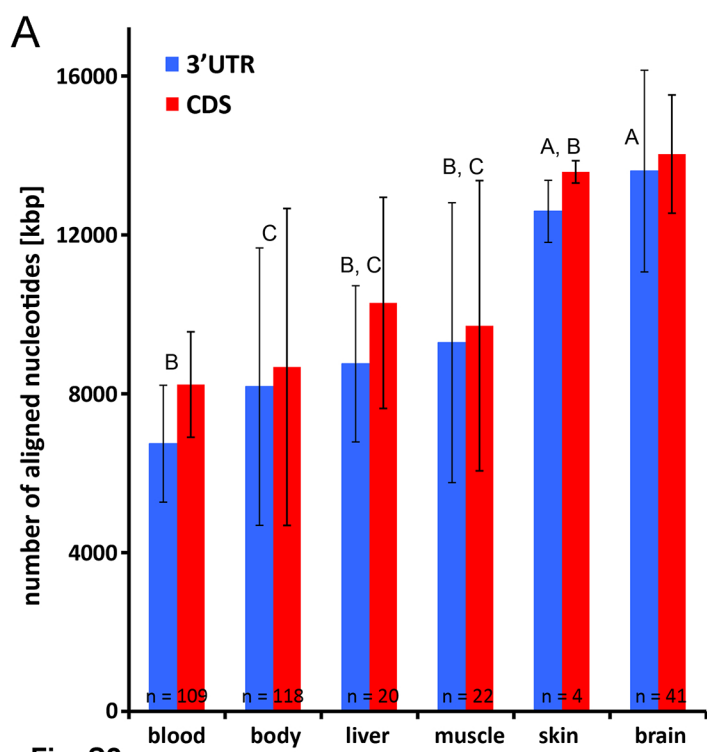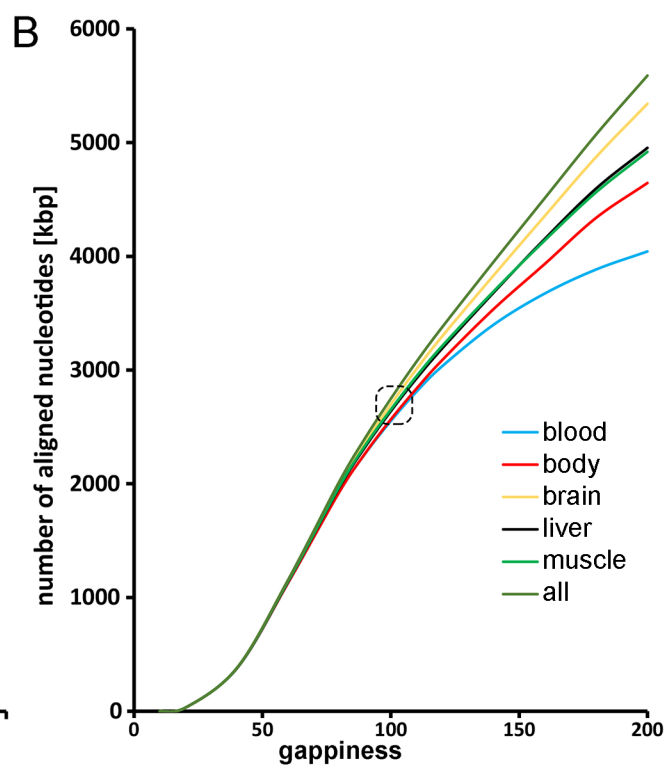

Fig. S2

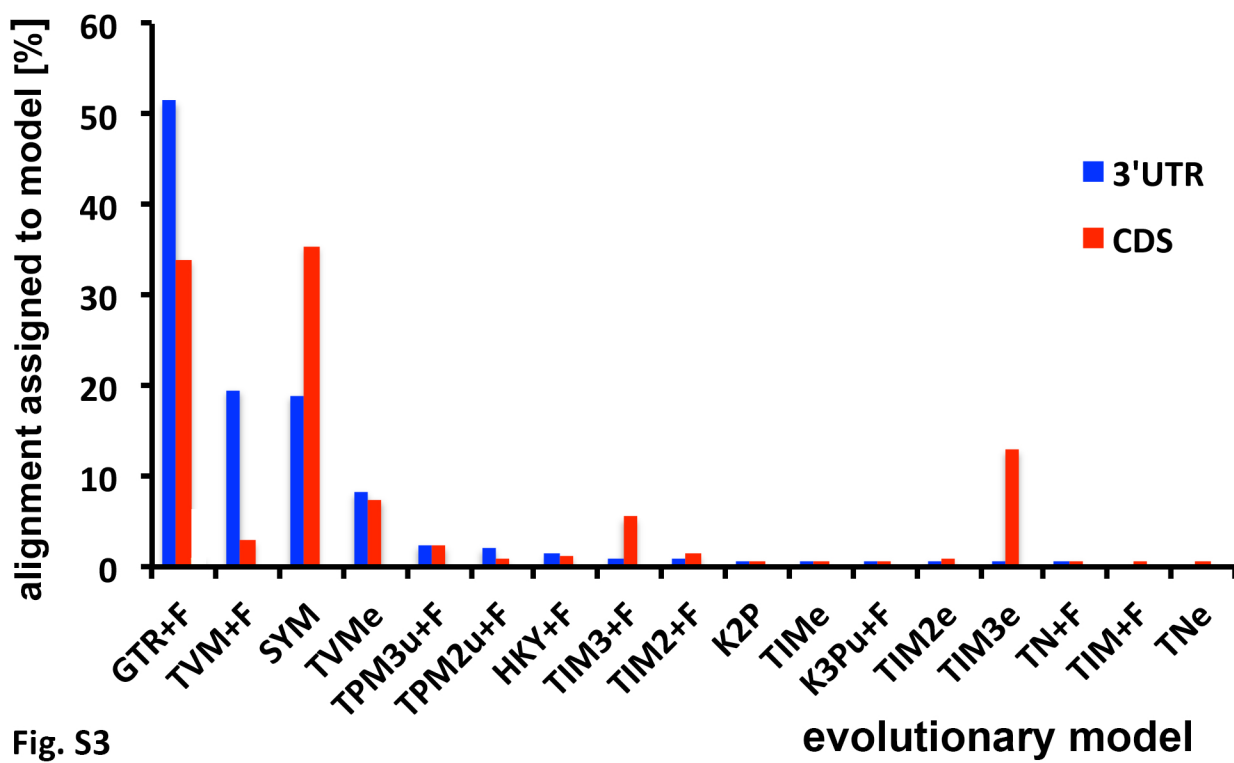

Fig. S3

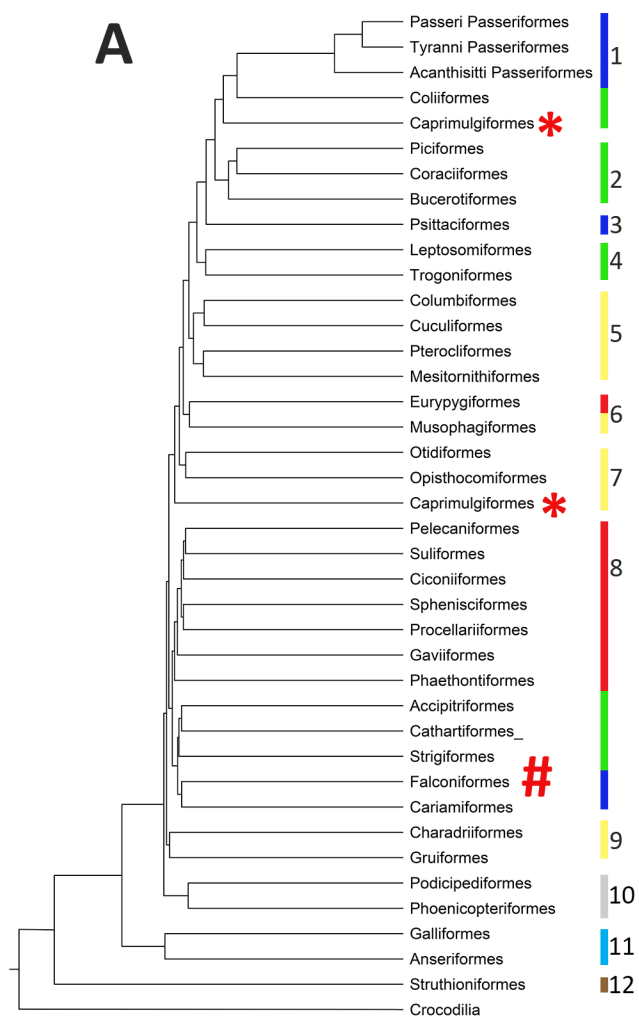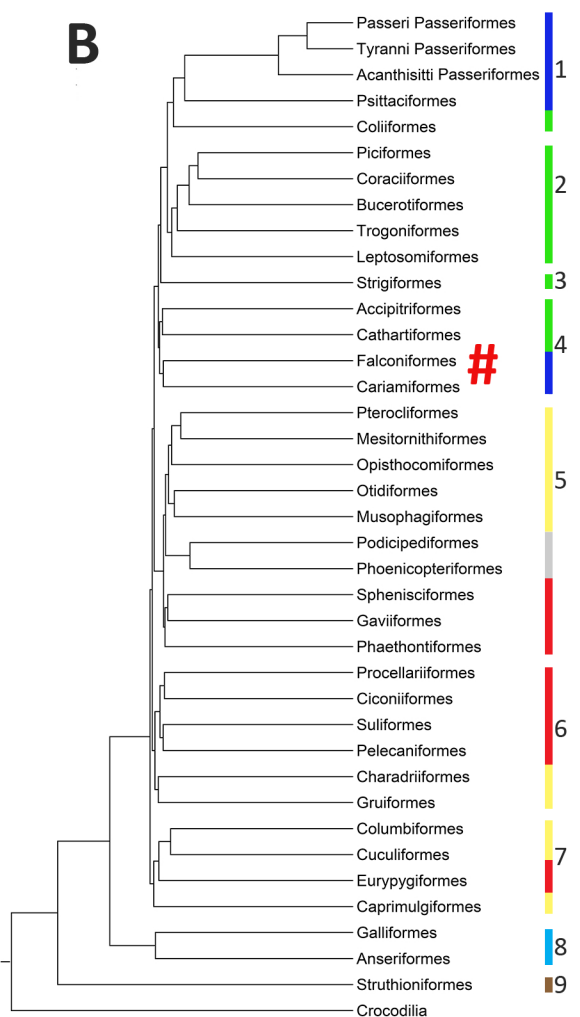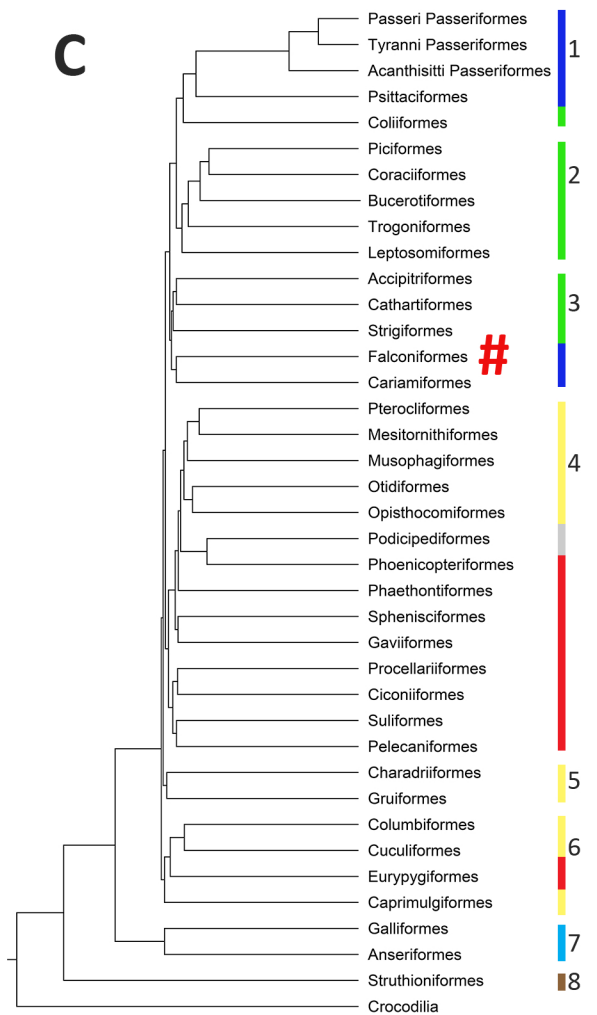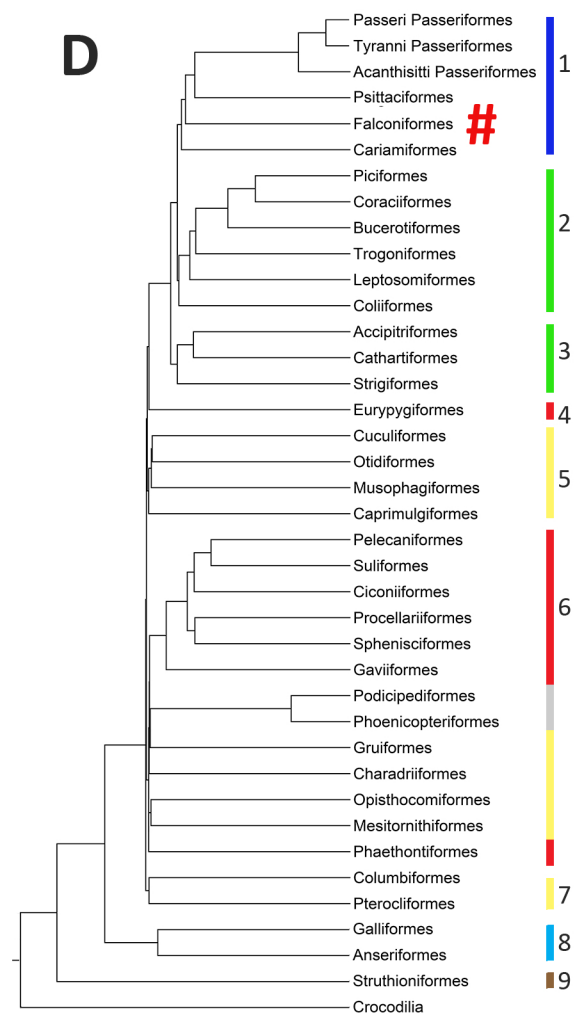

Fig. S4

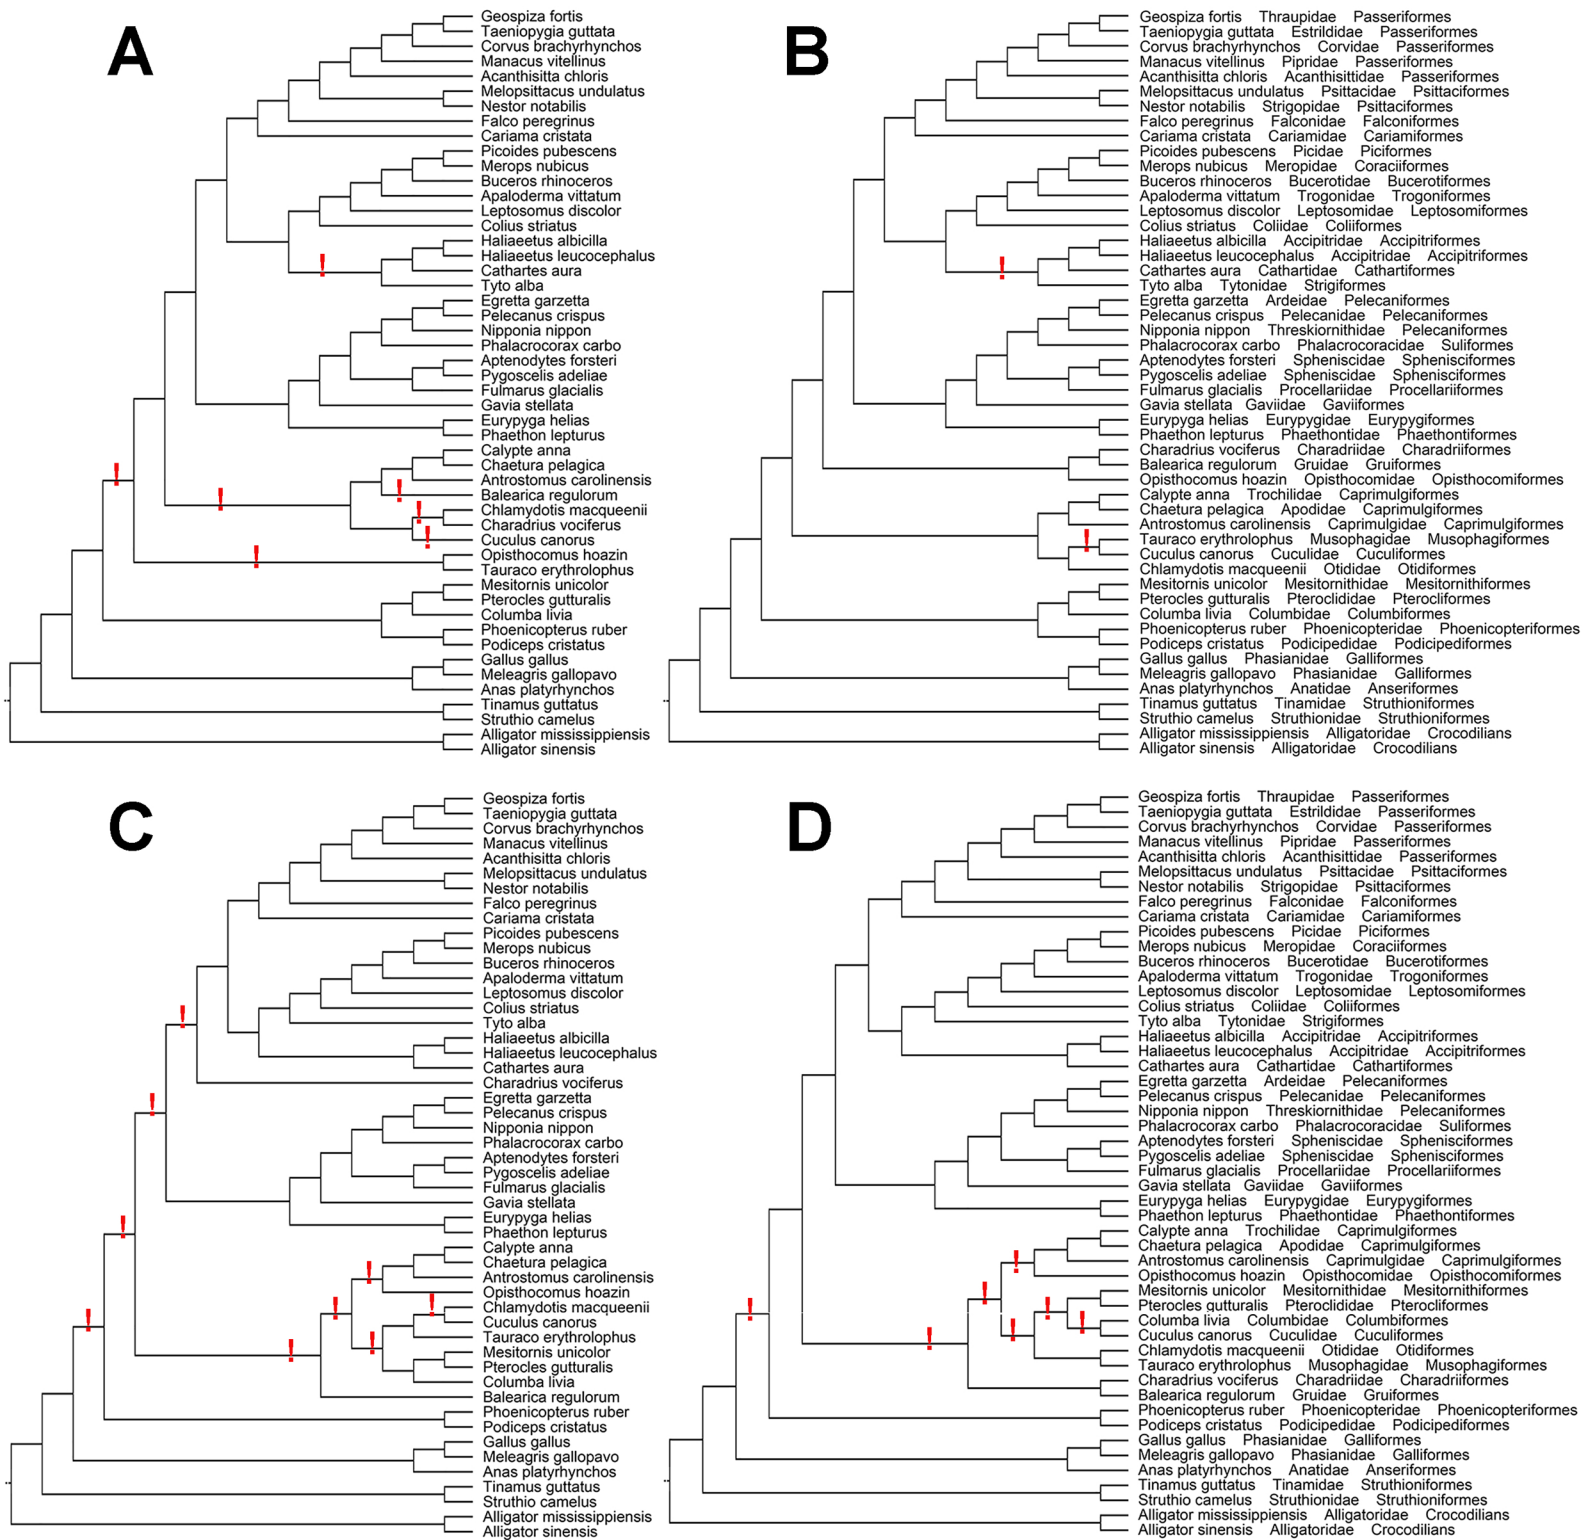

Fig. S5





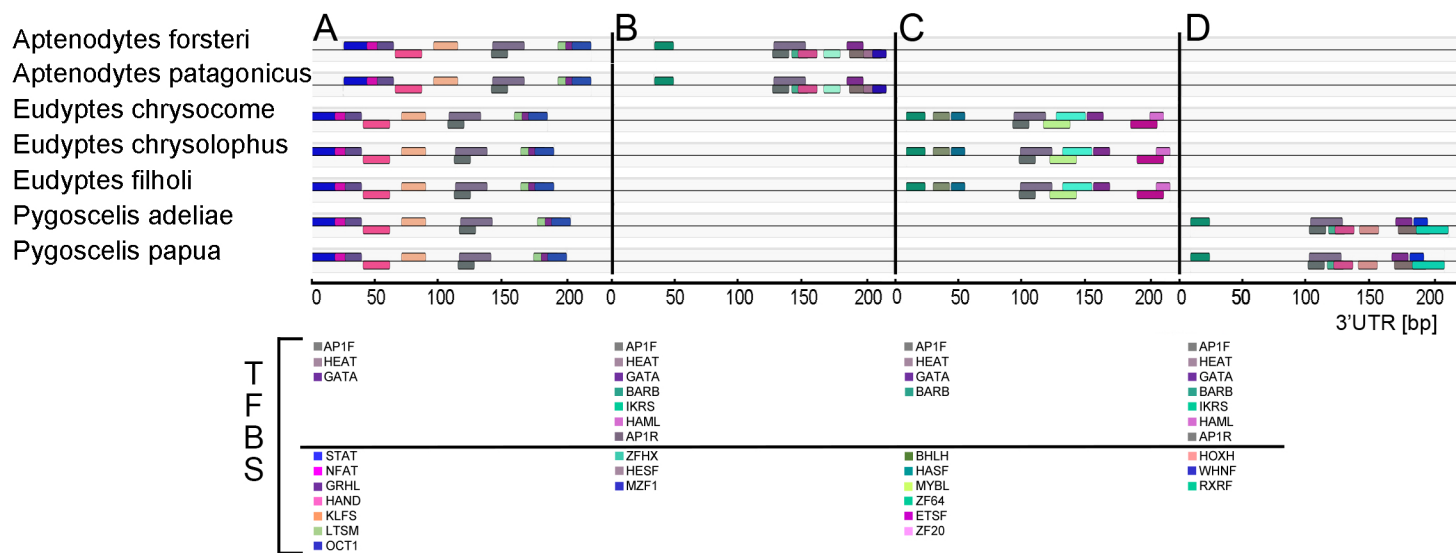

Fig. S7

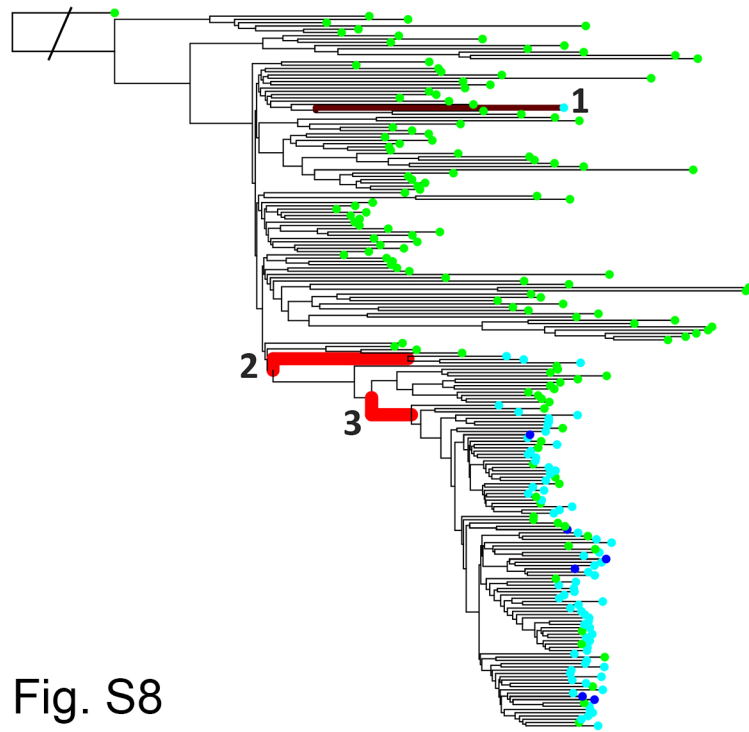

Fig. S8



# Tab. S1

| Species name                              | English species name          | Family-level taxon | Order-level taxon | Institute | Catalog Number | Country      | Year | Data Accession Numbers |
|-------------------------------------------|-------------------------------|--------------------|-------------------|-----------|----------------|--------------|------|------------------------|
| <b>A. Sequenced Transcriptomes (MPIO)</b> |                               |                    |                   |           |                |              |      |                        |
| <i>Abroscopus superciliosus</i>           | Yellow-bellied Warbler        | Scotocercidae      | Passeriformes     | LSUMNS    | B-51157        | Malaysia     |      | RRR10853103            |
| <i>Acanthiza pusilla</i>                  | Brown Thornbill               | Acanthizidae       | Passeriformes     | MPIO      |                | missing      | 2010 | RRR10853102            |
| <i>Accipiter nisus</i>                    | Eurasian Sparrowhawk          | Accipitridae       | Accipitriformes   | MPIO      |                | captive      | 2011 | RRR10852991            |
| <i>Acrocephalus palustris</i>             | Marsh Warbler                 | Acrocephalidae     | Passeriformes     | CGN       |                | Germany      | 2015 | RRR10852880            |
| <i>Actophilornis africanus</i>            | African Jacana                | Jacanidae          | Charadriiformes   | THH       |                | captive      | 2016 | RRR10852854            |
| <i>Aegithalos caudatus</i>                | Long-tailed Bushtit           | Aegithalidae       | Passeriformes     | MPIO      |                | Germany      | 2016 | RRR10852843            |
| <i>Aegotheles cristatus</i>               | Australian Owlet-Nightjar     | Aegothelidae       | Caprimulgiformes  | ANWC      | B53592         | Australia    |      | RRR10852832            |
| <i>Aegithina tiphia</i>                   | Common Iora                   | Aegithinidae       | Passeriformes     | CGN       |                | Indonesia    | 2004 | RRR10852821            |
| <i>Agapornis fischeri</i>                 | Fischer's Lovebird            | Psittacidae        | Psittaciformes    | MPIO      |                | captive      | 2015 | RRR10852810            |
| <i>Agapornis personatus</i>               | Yellow-collared Lovebird      | Psittacidae        | Psittaciformes    | MPIO      |                | captive      | 2015 | RRR10852799            |
| <i>Nectarinia tacaze</i>                  | Tacazze Sunbird               | Nectariniidae      | Passeriformes     | WZS       |                | captive      | 2015 | RRR10853101            |
| <i>Ailuroedus buccoides</i>               | White-eared Catbird           | Ptilonorhynchidae  | Passeriformes     | WZS       |                | captive      | 2015 | RRR10853090            |
| <i>Alauda arvensis</i>                    | Eurasian Skylark              | Alaudidae          | Passeriformes     | MPIO      |                | Germany      | 2013 | RRR10853079            |
| <i>Alcippe morrisonia</i>                 | Grey-cheeked Fulvetta         | Pellorneidae       | Passeriformes     | CGN       |                | Taiwan       | 2018 | RRR10853068            |
| <i>Alectura lathami</i>                   | Australian Brushturkey        | Megapodidae        | Galliformes       | VPW       |                | captive      | 2016 | RRR10853057            |
| <i>Alle alle</i>                          | Little Auk                    | Alcidae            | Charadriiformes   | UGP       |                | Poland       | 2012 | RRR10853046            |
| <i>Amandava amandava</i>                  | Red Avadavat                  | Estrildidae        | Passeriformes     | MPIO      |                | captive      | 2015 | RRR10853035            |
| <i>Amadina erythrocephala</i>             | Red-headed Finch              | Estrildidae        | Passeriformes     | MPIO      |                | captive      | 2015 | RRR10853024            |
| <i>Amadina fasciata</i>                   | Cut-throat Finch              | Estrildidae        | Passeriformes     | MPIO      |                | captive      | 2015 | RRR10853013            |
| <i>Amazilia versicolor</i>                | Versicolored Emerald          | Trochilidae        | Caprimulgiformes  | UFPB      |                | Brazil       | 2011 | RRR10853002            |
| <i>Anastomus lamelligerus</i>             | African Openbill              | Ciconiidae         | Pelecaniformes    | MFN       |                | captive      |      | RRR10852990            |
| <i>Anhinga anhinga</i>                    | Anhinga                       | Anhingidae         | Suliformes        | CGN       |                | Suriname     | 2009 | RRR10852979            |
| <i>Anseranas semipalmata</i>              | Magpie Goose                  | Anseranatidae      | Anseriformes      | ZGB       |                | captive      | 2015 | RRR10852968            |
| <i>Anthracothorax nigricollis</i>         | Black-throated Mango          | Trochilidae        | Caprimulgiformes  | UFPB      |                | Brazil       | 2011 | RRR10852957            |
| <i>Apteryx mantelli mantelli</i>          | North Island Brown Kiwi       | Apterygidae        | Struthioniformes  | ZGB       |                | captive      | 2015 | RRR10852946            |
| <i>Aptenodytes patagonicus</i>            | King Penguin                  | Spheniscidae       | Sphenisciformes   | UPS       |                | France       | 2017 | RRR10852935            |
| <i>Apus apus</i>                          | Common Swift                  | Apodidae           | Caprimulgiformes  | MPIO      |                | Germany      | 2013 | RRR10852924            |
| <i>Aramus guarana</i>                     | Limpkin                       | Aramidae           | Gruidiformes      | LSUMNS    | B-10769        | Peru         |      | RRR10852913            |
| <i>Ardenna tenuirostris</i>               | Short-tailed Shearwater       | Procellariidae     | Procellariiformes | PINP      |                | Australia    | 2015 | RRR10852902            |
| <i>Artamus cyanopterus</i>                | Dusky Woodswallow             | Artamidae          | Passeriformes     | ANWC      | B50232         | Australia    |      | RRR10852891            |
| <i>Atelornis pittoides</i>                | Blaukopf-Erdreacke            | Brachypteraciidae  | Coraciiformes     | ZZ        |                | captive      | 2018 | RRR10852879            |
| <i>Attagis gayi</i>                       | Rufous-bellied Seedsnipe      | Thinocoridae       | Charadriiformes   | LSUMNS    | B-103907       | Peru         |      | RRR10852868            |
| <i>Balaeniceps rex</i>                    | Shoebill                      | Balaenicipitidae   | Pelecaniformes    | MFN       |                | captive      |      | RRR10852862            |
| <i>Bombicilla garrulus</i>                | Bohemian Waxwing              | Bombicillidae      | Passeriformes     | MPIO      |                | captive      | 2014 | RRR10852861            |
| <i>Buceros bicornis</i>                   | Great Hornbill                | Bucerotidae        | Passeriformes     | WZS       |                | captive      | 2015 | RRR10852860            |
| <i>Bucco tamatia</i>                      | Spotted Puffbird              | Bucconidae         | Piciformes        | LSUMNS    | B-14722        | Bolivia      |      | RRR10852859            |
| <i>Bugeranus carunculatus</i>             | Wattled Crane                 | Gruidae            | Gruidiformes      | ZGK       |                | captive      | 2015 | RRR10852858            |
| <i>Buphagus erythrorhynchus</i>           | Red-billed Oxpecker           | Buphagidae         | Passeriformes     | THH       |                | captive      | 2016 | RRR10852857            |
| <i>Burhinus capensis</i>                  | Spotted Thick-knee            | Burhinidae         | Charadriiformes   | ZGK       |                | captive      | 2015 | RRR10852856            |
| <i>Butorides striata</i>                  | Striated Heron                | Ardeidae           | Pelecaniformes    | UFPB      |                | Brazil       | 2011 | RRR10852855            |
| <i>Cacatua ducorpsii</i>                  | Broad-crested Corella         | Cacatuidae         | Psittaciformes    | MPIO      |                | captive      | 2014 | RRR10852853            |
| <i>Calliphlox amethystina</i>             | Amethyst Woodstar             | Trochilidae        | Caprimulgiformes  | UFPB      |                | Brazil       | 2011 | RRR10852852            |
| <i>Calcarius lapponicus</i>               | Lapland Longspur              | Calcariidae        | Passeriformes     | CGN       |                | Russia       | 2017 | RRR10852851            |
| <i>Campylopterus largipennis</i>          | Grey-breasted Sabrewing       | Trochilidae        | Caprimulgiformes  | UFPB      |                | Brazil       | 2011 | RRR10852850            |
| <i>Caprimulgus inornatus</i>              | Plain Nightjar                | Caprimulgidae      | Caprimulgiformes  | CGN       |                | South Sudan  | 2010 | RRR10852849            |
| <i>Carduelis cannabina</i>                | Common Linnet                 | Fringillidae       | Passeriformes     | MPIO      |                | Germany      | 2017 | RRR10852848            |
| <i>Cardinalis cardinalis</i>              | Northern Cardinal             | Cardinalidae       | Passeriformes     | MPIO      |                | captive      | 2014 | RRR10852847            |
| <i>Cariama cristata</i>                   | Red-legged Seriema            | Cariamidae         | Passeriformes     | ZGW       |                | captive      | 2016 | RRR10852846            |
| <i>Casuarus casuarus</i>                  | Southern Cassowary            | Casuariidae        | Struthioniformes  | ANWC      | B29953         | Australia    |      | RRR10852845            |
| <i>Cathartes melambrotus</i>              | Greater Yellow-headed Vulture | Cathartidae        | Cathartiformes    | CGN       |                | Suriname     | 2009 | RRR10852844            |
| <i>Centropus superciliosus</i>            | White-browed Coucal           | Cuculidae          | Cuculiformes      | MPIO      |                | Tanzania     | 2001 | RRR10852842            |
| <i>Certhia brachydactyla</i>              | Short-toed Treecreeper        | Certhiidae         | Passeriformes     | MPIO      |                | Germany      | 2014 | RRR10852841            |
| <i>Cereopsis novaehollandiae</i>          | Cape Barren Goose             | Anatidae           | Anseriformes      | CLB       |                | captive      | 2016 | RRR10852840            |
| <i>Cettia diphone</i>                     | Japanese Bush Warbler         | Cettidae           | Passeriformes     | UWBM      | 47251          | Russia       | 1993 | RRR10852839            |
| <i>Ispidina picta</i>                     | African Pygmy Kingfisher      | Alcedinidae        | Coraciiformes     | CKC       |                | captive      | 2011 | RRR10852838            |
| <i>Chaetops aurantius</i>                 | Drakensburg Rockjumper        | Chaetopidae        | Passeriformes     | UWBM      | 52973          | South Africa | 1994 | RRR10852837            |
| <i>Charadrius hiaticula</i>               | Common Ringed Plover          | Charadriidae       | Charadriiformes   | ZGK       |                | captive      | 2015 | RRR10852836            |
| <i>Chauna torquata</i>                    | Southern Screamer             | Anhimidae          | Anseriformes      | TPB       |                | captive      | 2016 | RRR10852835            |
| <i>Chionis albus</i>                      | Snowy Sheathbill              | Chionidae          | Charadriiformes   | CGN       |                | Argentina    | 1997 | RRR10852834            |
| <i>Chloris chloris</i>                    | European Greenfinch           | Fringillidae       | Passeriformes     | MPIO      |                | Germany      | 2017 | RRR10852833            |
| <i>Chloropsis cochinchinensis</i>         | Blue-winged Leafbird          | Chloropseidae      | Passeriformes     | MPIO      |                | captive      | 2014 | RRR10852831            |
| <i>Chloebia gouldiae</i>                  | Gouldian Finch                | Estrildidae        | Passeriformes     | MPIO      |                | captive      | 2015 | RRR10852830            |
| <i>Chlorostilbon notatus</i>              | Blue-chinned sapphire         | Trochilidae        | Caprimulgiformes  | UFPB      |                | Brazil       | 2011 | RRR10852829            |
| <i>Chroicocephalus ridibundus</i>         | Common Black-headed Gull      | Laridae            | Charadriiformes   | MPIO      |                | captive      | 2014 | RRR10852828            |
| <i>Cinclus cinclus</i>                    | White-throated Dipper         | Cinclidae          | Passeriformes     | AI        |                | captive      | 2016 | RRR10852827            |
| <i>Cinlosoma clarum</i>                   | Chestnut-backed Quail-thrush  | Cinclosomatidae    | Passeriformes     | ANWC      | B51838         | Australia    |      | RRR10852826            |
| <i>Cisticola galactotes</i>               | Rufous-winged Cisticola       | Cisticolidae       | Passeriformes     | MPIO      |                | Tanzania     | 2001 | RRR10852825            |
| <i>Climacteris picumnus</i>               | Brown Treecreeper             | Climacteridae      | Passeriformes     | ANWC      | B49917         | Australia    |      | RRR10852824            |
| <i>Clytospsiza montei</i>                 | Brown Twinspot                | Estrildidae        | Passeriformes     | MPIO      |                | captive      | 2015 | RRR10852823            |
| <i>Cnemophilus loriae</i>                 | Velvet Satinbird              | Cnemophilidae      | Passeriformes     | MVM       | Z43659         | Papua NG     |      | RRR10852822            |

|                               |                                 |                   |                  |        |         |              |      |             |
|-------------------------------|---------------------------------|-------------------|------------------|--------|---------|--------------|------|-------------|
| Coccothraustes coccothraustes | Hawfinch                        | Fringillidae      | Passeriformes    | MPIO   |         | Germany      | 2017 | SRR10852820 |
| Coereba flaveola              | Bananaquit                      | Coerebidae        | Passeriformes    | CGN    |         | Suriname     | 2009 | SRR10852819 |
| Columba palumbus              | Common Wood Pigeon              | Columbidae        | Columbiformes    | MPIO   |         |              | 2015 | SRR10852818 |
| Colinus virginianus           | Northern Bobwhite               | Odontophoridae    | Galliformes      | MPIO   |         |              | 2014 | SRR10852817 |
| Conopophaga lineata           | Rufous Gnatcatcher              | Conopophagidae    | Passeriformes    | UFPB   |         | Brazil       | 2011 | SRR10852816 |
| Coracias caudatus             | Lilac-breasted Roller           | Coraciidae        | Coraciiformes    | ZGK    |         |              | 2015 | SRR10852815 |
| Corcorax melanorhamphos       | White-winged Chough             | Struthideidae     | Passeriformes    | ANWC   | B49971  | Australia    |      | SRR10852814 |
| Corvus monedula               | Western Jackdaw                 | Corvidae          | Passeriformes    | MPIO   |         |              | 2015 | SRR10852813 |
| Coracina novaehollandiae      | Black-faced Cuckooshrike        | Campephagidae     | Passeriformes    | ANWC   | B55082  | Australia    |      | SRR10852812 |
| Cracticus tibicen             | Australian Magpie               | Artamidae         | Passeriformes    | ANWC   | B51356  | Australia    |      | SRR10852811 |
| Crotophaga ani                | Smooth-billed Ani               | Cuculidae         | Cuculiformes     | UFPB   |         | Brazil       | 2011 | SRR10852809 |
| Crypturellus tataupa          | Tataupa Tinamou                 | Tinamidae         | Struthioniformes | MPIO   |         |              | 2016 | SRR10852808 |
| Cyanoramphus novaeseelandiae  | Red-fronted Parakeet            | Psittacidae       | Psittaciformes   | MPIO   |         |              | 2015 | SRR10852807 |
| Dacelo novaeguineae           | Laughing Kookaburra             | Alcedinidae       | Coraciiformes    | ZGK    |         |              | 2015 | SRR10852806 |
| Daphoenositta chrysoptera     | Varied Sittella                 | Neositidae        | Passeriformes    | ANWC   | B43320  | Australia    |      | SRR10852805 |
| Dendrocopos major             | Great Spotted Woodpecker        | Picidae           | Piciformes       | MPIO   |         | Germany      | 2017 | SRR10852804 |
| Dicrurus adsimilis            | Fork-tailed Drongo              | Dicruridae        | Passeriformes    | MPIO   |         | South Africa | 2001 | SRR10852803 |
| Dicaeum geelvinkianum         | Red-capped Flowerpecker         | Dicaeidae         | Passeriformes    | ANWC   | B56396  | Australia    |      | SRR10852802 |
| Dicrurus paradiseus           | Greater Racket-tailed Drongo    | Dicruridae        | Passeriformes    | CGN    |         | Indonesia    |      | SRR10852801 |
| Donacobius atricapillus       | Black-capped Donacobius         | Donacobidae       | Passeriformes    | LSUMNS | B-37871 | Bolivia      |      | SRR10852800 |
| Dromas ardeola                | Crab-plover                     | Dromadidae        | Charadriiformes  | CGN    |         | Tanzania     | 2019 | SRR10852798 |
| Dromaius novaehollandiae      | Emu                             | Casuaridae        | Struthioniformes | ANWC   | B44264  | Australia    |      | SRR10852797 |
| Elminia albonotata            | White-tailed Crested-Flycatcher | Stenostiridae     | Passeriformes    | CGN    |         | Kenya        | 2017 | SRR10852796 |
| Emberiza citrinella           | Yellowhammer                    | Emberizidae       | Passeriformes    | MPIO   |         | Germany      | 2017 | SRR10852795 |
| Emblema pictum                | Painted Finch                   | Estrildidae       | Passeriformes    | MPIO   |         |              | 2015 | SRR10852794 |
| Erythrura psittacea           | Red-throated Parrot-Finch       | Estrildidae       | Passeriformes    | MPIO   |         |              | 2015 | SRR10852793 |
| Estrilda melpoda              | Orange-cheeked Waxbill          | Estrildidae       | Passeriformes    | MPIO   |         |              | 2015 | SRR10852792 |
| Eubucco versicolor            | Versicolored Barbet             | Capitonidae       | Piciformes       | UWBM   | 77164   | Bolivia      |      | SRR10852791 |
| Eudromia elegans              | Elegant Crested Tinamou         | Tinamidae         | Struthioniformes | MPIO   |         |              | 2016 | SRR10852790 |
| Eudocia cantans               | African Silverbill              | Estrildidae       | Passeriformes    | MPIO   |         |              | 2015 | SRR10852789 |
| Eurystomus glaucurus          | Broad-billed Roller             | Coraciidae        | Coraciiformes    | CKC    |         |              | 2011 | SRR10853100 |
| Eurypyga helias               | Sunbittern                      | Eurypygidae       | Eurypygiformes   | UFPB   |         | Brazil       | 2011 | SRR10853099 |
| Eurylaimus ochromalus         | Black-and-yellow Broadbill      | Eurylaimidae      | Passeriformes    | LSUMNS | B-50329 | Malaysia     |      | SRR10853098 |
| Euschistospiza dybowskii      | Dybowski's Twinspot             | Estrildidae       | Passeriformes    | CGN    |         | South Sudar  | 2010 | SRR10853097 |
| Falculea palliata             | Sickle-billed Vanga             | Vangidae          | Passeriformes    | VPW    |         |              | 2016 | SRR10853096 |
| Falco sparverius              | American Kestrel                | Falconidae        | Falconiformes    | MNHNC  |         |              |      | SRR10853095 |
| Florisuga fuscus              | Black Jacobin                   | Trochilidae       | Caprimulgiformes | UFPB   |         | Brazil       | 2011 | SRR10853094 |
| Florisuga mellivora           | White-necked Jacobin            | Trochilidae       | Caprimulgiformes | UFPB   |         | Brazil       | 2011 | SRR10853093 |
| Fregata magnificens           | Magnificent Frigatebird         | Fregatidae        | Suliformes       | UWBM   | 73908   | Panama       |      | SRR10853092 |
| Fringilla coelebs             | Common Chaffinch                | Fringillidae      | Passeriformes    | MPIO   |         | Germany      | 2017 | SRR10853091 |
| Furnarius rufus               | Rufous Hornero                  | Furnariidae       | Passeriformes    | UFPB   |         | Brazil       | 2011 | SRR10853089 |
| Galbula ruficauda             | Rufous-tailed Jacamar           | Galbulidae        | Piciformes       | LSUMNS | B-18480 | Bolivia      |      | SRR10853088 |
| Garrulax leucolophus          | White-crested Laughingthrush    | Leiothrichidae    | Passeriformes    | MPIO   |         |              | 2014 | SRR10853087 |
| Gavia stellata                | Red-throated Loon               | Gaviidae          | Gaviiformes      | UWBM   | 44653   | Russia       |      | SRR10853086 |
| Geronticus eremita            | Northern Bald Ibis              | Threskiornithidae | Pelecaniformes   | THM    |         |              | 2016 | SRR10853085 |
| Gerygone flavolateralis       | Fan-tailed Gerygone             | Acanthizidae      | Passeriformes    | TUM    |         | New Caledo   | 2010 | SRR10853084 |
| Glaucidium nanum              | Austral Pygmy Owl               | Strigidae         | Strigiformes     | MNHNC  |         | Chile        |      | SRR10853083 |
| Grallina cyanoleuca           | Magpie-lark                     | Monarchidae       | Passeriformes    | ANWC   | B55153  | Australia    |      | SRR10853082 |
| Gymnoderus foetidus           | Bare-necked Fruitcrow           | Cotingidae        | Passeriformes    | CGN    |         | Suriname     | 2009 | SRR10853081 |
| Haematopus palliatus          | American Oystercatcher          | Haematopodidae    | Charadriiformes  | UFPB   |         | Brazil       | 2011 | SRR10853080 |
| Heliornis fulica              | Sungrebe                        | Heliornithidae    | Gruiformes       | CGN    |         | Suriname     | 2009 | SRR10853078 |
| Hemiprocne mystacea           | Moustached Treeswift            | Hemiprocnidae     | Caprimulgiformes | ANWC   | B56259  | Australia    |      | SRR10853077 |
| Heteromunia pectoralis        | Pictorella Munia                | Estrildidae       | Passeriformes    | ANWC   | B55173  | Australia    |      | SRR10853076 |
| Himantopus himantopus         | Black-winged Stilt              | Recurvirostridae  | Charadriiformes  | WZS    |         |              | 2015 | SRR10853075 |
| Hirundo rustica               | Barn Swallow                    | Hirundinidae      | Passeriformes    | MPIO   |         | Germany      | 2017 | SRR10853074 |
| Hylia prasina                 | Green Hylia                     | Hylidae           | Passeriformes    | CGN    |         | South Sudar  | 2010 | SRR10853073 |
| Hypocolius ampelinus          | Hypocolius                      | Hypocoliidae      | Passeriformes    | ZH     |         |              | 2016 | SRR10853072 |
| Hypargos niveoguttatus        | Red-throated Twinspot           | Estrildidae       | Passeriformes    | MPIO   |         |              | 2015 | SRR10853071 |
| Ifrita kowaldi                | Blue-capped Iffit               | Ifritidae         | Passeriformes    | MVM    | Z43109  | Papua NG     |      | SRR10853070 |
| Indicator indicator           | Greater Honeyguide              | Indicatoridae     | Piciformes       | LSUMNS | B-39498 | Ghana        |      | SRR10853069 |
| Irena puella                  | Asian Fairy-bluebird            | Irenidae          | Passeriformes    | WZS    |         |              | 2016 | SRR10853067 |
| Lagopus lagopus               | Willow Ptarmigan                | Phasianidae       | Galliformes      | CLB    |         |              | 2016 | SRR10853066 |
| Lagonosticta rubricata        | African Firefinch               | Estrildidae       | Passeriformes    | MPIO   |         |              | 2015 | SRR10853065 |
| Lamprospiza melanoleuca       | Red-billed Pied Tanager         | Mitrospingidae    | Passeriformes    | LSUMNS | B-40857 | Peru         |      | SRR10853064 |
| Lanius collurio               | Red-backed Shrike               | Laniidae          | Passeriformes    | MPIO   |         | Germany      | 2017 | SRR10853063 |
| Laniarius funebris            | Slate-colored Boubou            | Malacoenotidae    | Passeriformes    | MPIO   |         |              | 2014 | SRR10853062 |
| Larus crassirostris           | Black-tailed Gull               | Laridae           | Charadriiformes  | TPB    |         |              | 2016 | SRR10853061 |
| Larosterna inca               | Inca Tern                       | Sternidae         | Charadriiformes  | CLB    |         |              | 2016 | SRR10853060 |
| Laterallus leucopyrrhus       | Red-and-white Crane             | Rallidae          | Gruiformes       | MPIO   |         |              | 2015 | SRR10853059 |
| Leiothrix lutea               | Red-billed Leiothrix            | Leiothrichidae    | Passeriformes    | MPIO   |         |              | 2014 | SRR10853058 |
| Leptosomus discolor           | Cuckoo Roller                   | Leptosomidae      | Leptosomiformes  | VPW    |         |              | 2016 | SRR10853056 |
| Leucopsar rothschildi         | Bali Myna                       | Sturnidae         | Passeriformes    | ZGK    |         |              | 2015 | SRR10853055 |
| Lipaugus vociferans           | Screaming Piha                  | Cotingidae        | Passeriformes    | UFPB   |         | Brazil       | 2011 | SRR10853054 |
| Locustella naevia             | Common Grasshopper Warbler      | Locustellidae     | Passeriformes    | MFN    |         | Germany      |      | SRR10853053 |
| Lonchura striata              | White-rumped Munia              | Estrildidae       | Passeriformes    | MPIO   |         |              | 2015 | SRR10853052 |
| Lophophanes cristatus         | European Crested Tit            | Paridae           | Passeriformes    | MPIO   |         | Germany      | 2017 | SRR10853051 |
| Lophornis magnificus          | Friiled Coquette                | Trochilidae       | Caprimulgiformes | UFPB   |         | Brazil       | 2011 | SRR10853050 |

|                              |                             |                   |                     |        |         |              |      |             |
|------------------------------|-----------------------------|-------------------|---------------------|--------|---------|--------------|------|-------------|
| Lophorina superba            | Superb Bird-of-Paradise     | Paradisaeidae     | Passeriformes       | CGN    |         | Indonesia    | 2018 | SRR10853049 |
| Malurus melanocephalus       | Red-backed Fairywren        | Maluridae         | Passeriformes       | WSU    |         | Australia    | 2012 | SRR10853048 |
| Malacoptila panamensis       | White-whiskered Puffbird    | Bucconidae        | Piciformes          | UWBM   | 77010   | Panama       |      | SRR10853047 |
| Mandingoa nitidula           | Green Twinspot              | Estrildidae       | Passeriformes       | LSUMNS | B-45139 | Ghana        |      | SRR10853045 |
| Manacus vitellinus           | Golden-collared Manakin     | Pipridae          | Passeriformes       | UV     |         | Panama       | 2014 | SRR10853044 |
| Megalaima asiatica           | Blue-throated Barbet        | Megalaimidae      | Piciformes          | WZS    |         | captive      | 2015 | SRR10853043 |
| Melanerpes cruentatus        | Yellow-tufted Woodpecker    | Picidae           | Piciformes          | UFPB   |         | Brazil       | 2011 | SRR10853042 |
| Melanodryas cucullata        | Hooded Robin                | Petroicidae       | Passeriformes       | ANWC   | B32048  | Australia    |      | SRR10853041 |
| Melanocharis versteri        | Fan-tailed Berrypecker      | Melanocharitidae  | Passeriformes       | ANWC   | B-52506 | Australia    |      | SRR10853040 |
| Menura novaehollandiae       | Superb Lyrebird             | Menuridae         | Passeriformes       | ANWC   | B46196  | Australia    |      | SRR10853039 |
| Microeca papuana             | Canary Flyrobin             | Petroicidae       | Passeriformes       | CGN    |         | Indonesia    | 2018 | SRR10853038 |
| Micrastur ruficollis         | Barred Forest Falcon        | Herpethotheriidae | Falconiformes       | LSUMNS | B-14605 | Bolivia      |      | SRR10853037 |
| Milvago chimachima           | Yellow-headed Caracara      | Polyborini        | Falconiformes       | MNHNC  |         | captive      |      | SRR10853036 |
| Mimus saturninus             | Chalk-browed Mockingbird    | Mimidae           | Passeriformes       | UFPB   |         | Brazil       | 2011 | SRR10853034 |
| Molothrus ater               | Brown-headed Cowbird        | Icteridae         | Passeriformes       | UWBM   | 118374  | USA          |      | SRR10853033 |
| Momotus momota               | Blue-crowned Motmot         | Momotidae         | Coraciiformes       | CGN    |         | Suriname     | 2009 | SRR10853032 |
| Monarcha melanopsis          | Australian Logrunner        | Orthonychidae     | Passeriformes       | ANWC   | B46917  | Australia    |      | SRR10853031 |
| Morus bassanus               | Northern Gannet             | Sulidae           | Suliformes          | WZS    |         | captive      | 2015 | SRR10853030 |
| Motacilla flava              | Western Yellow Wagtail      | Motacillidae      | Passeriformes       | MPIO   |         | Germany      | 2017 | SRR10853029 |
| Musophaga violacea           | Violet Turaco               | Musophagidae      | Musophagiformes     | ZGK    |         | captive      | 2015 | SRR10853028 |
| Myiozetetes cayanensis       | Rusty-margined Flycatcher   | Tyrannidae        | Passeriformes       | UFPB   |         | Brazil       | 2011 | SRR10853027 |
| Neochmia temporalis          | Red-browed Finch            | Estrildidae       | Passeriformes       | MPIO   |         | captive      | 2015 | SRR10853026 |
| Nestor meridionalis          | New Zealand Kaka            | Strigopidae       | Psittaciformes      | WZS    |         | captive      | 2015 | SRR10853025 |
| Nicator chloris              | Western Nicator             | Nicatoridae       | Passeriformes       | LSUMNS | B-45344 | Ghana        |      | SRR10853023 |
| Nigrita canicapilla          | Grey-headed Nigrita         | Estrildidae       | Passeriformes       | CKC    |         | captive      | 2011 | SRR10853022 |
| Numida meleagris             | Helmeted Guineafowl         | Numididae         | Galliformes         | MPIO   |         | captive      | 2011 | SRR10853021 |
| Nyctidromus albigollis       | Pauraque                    | Caprimulgidae     | Caprimulgiformes    | UFPB   |         | Brazil       | 2011 | SRR10853020 |
| Nyctibius grandis            | Great Potoo                 | Nyctibiidae       | Caprimulgiformes    | LSUMNS | B-15415 | Bolivia      |      | SRR10853019 |
| Nymphicus hollandicus        | Cockatiel                   | Cacatuidae        | Psittaciformes      | MPIO   |         | captive      | 2014 | SRR10853018 |
| Oceanodroma leucorhoa        | Leach's Storm Petrel        | Hydrobatidae      | Procellariiformes   | UWBM   | 60497   | missing      |      | SRR10853017 |
| Oceanites oceanicus          | Wilson's Storm Petrel       | Oceanitidae       | Procellariiformes   | UG     |         | Argentina    | 2014 | SRR10853016 |
| Opisthocomus hoazin          | Hoatzin                     | Opisthocomidae    | Opisthocomiformes   | CGN    |         | Suriname     | 2009 | SRR10853015 |
| Oriolus oriolus              | Eurasian Golden Oriole      | Oriolidae         | Passeriformes       | MPIO   |         | Germany      | 2017 | SRR10853014 |
| Ortygospiza atricollis       | Black-faced Quail-Finch     | Estrildidae       | Passeriformes       | MPIO   |         | captive      | 2015 | SRR10853012 |
| Orthonyx temminckii          | Black-faced Monarch         | Monarchidae       | Passeriformes       | ANWC   | B47270  | Australia    |      | SRR10853011 |
| Otis tarda                   | Great Bustard               | Otididae          | Otidiformes         | TPB    |         | captive      | 2016 | SRR10853010 |
| Pachycephala rufiventris     | Rufous Whistler             | Pachycephalidae   | Passeriformes       | ANWC   | B29590  | Australia    |      | SRR10853009 |
| Padda oryzivora              | Java Sparrow                | Estrildidae       | Passeriformes       | MPIO   |         | captive      | 2015 | SRR10853008 |
| Panurus biarmicus            | Bearded Reedling            | Panuridae         | Passeriformes       | MPIO   |         | Germany      | 2017 | SRR10853007 |
| Parmoptila jamesoni          | Jameson's Antpecker         | Estrildidae       | Passeriformes       | LSUMNS | B-45141 | Ghana        |      | SRR10853006 |
| Parus major                  | Great Tit                   | Paridae           | Passeriformes       | MPIO   |         | Germany      | 2017 | SRR10853005 |
| Paramythia montium olivacea  | Crested Berrypecker         | Paramythiidae     | Passeriformes       | CGN    |         | Indonesia    | 2018 | SRR10853004 |
| Pardalotus punctatus         | Spotted Pardalote           | Pardalotidae      | Passeriformes       | ANWC   | B49956  | Australia    |      | SRR10853003 |
| Parabuteo unicinctus         | Harris's Hawk               | Accipitridae      | Accipitriformes     | MNHNC  |         | captive      |      | SRR10853001 |
| Passer domesticus            | House Sparrow               | Passeridae        | Passeriformes       | MPIO   |         | Germany      | 2017 | SRR10853000 |
| Pauxi pauxi                  | Northern Helmeted Curassow  | Cracidae          | Galliformes         | MPIO   |         | captive      | 2015 | SRR10852999 |
| Pedionomus torquatus         | Plains-wanderer             | Pedionomidae      | Charadriiformes     | ANWC   | B44673  | Australia    |      | SRR10852998 |
| Pellorneum capistratum       | Black-capped Babbler        | Pellorneidae      | Passeriformes       | LSUMNS | B-46995 | Malaysia     |      | SRR10852997 |
| Pelecanus onocrotalus        | Great White Pelican         | Pelecanidae       | Pelecaniformes      | WZS    |         | captive      | 2015 | SRR10852996 |
| Periparus ater               | Coal Tit                    | Paridae           | Passeriformes       | MPIO   |         | Germany      | 2017 | SRR10852995 |
| Peucedramus taeniatus        | Olive Warbler               | Peucedramidae     | Passeriformes       | UWBM   | 77814   | USA          |      | SRR10852994 |
| Phalacrocorax carbo          | Great Cormorant             | Phalacrocoracidae | Suliformes          | MPIO   |         | Germany      | 2017 | SRR10852993 |
| Phaethon lepturus            | White-tailed Tropicbird     | Phaethontidae     | Phaethontiformes    | ULR    |         | France       | 2010 | SRR10852992 |
| Phainopepla nitens           | Phainopepla                 | Ptilonotidae      | Passeriformes       | UWBM   | 117656  | USA          |      | SRR10852989 |
| Phaethornis ruber            | Reddish Hermit              | Trochilidae       | Caprimulgiformes    | UFPB   |         | Brazil       | 2011 | SRR10852988 |
| Phaethornis superciliosus    | Long-tailed Hermit          | Trochilidae       | Caprimulgiformes    | UFPB   |         | Brazil       | 2011 | SRR10852987 |
| Pheugopedius genibarbis      | Moustached Wren             | Troglodytidae     | Passeriformes       | UFPB   |         | Brazil       | 2011 | SRR10852986 |
| Philomachus pugnax           | Ruff                        | Scolopacidae      | Charadriiformes     | MPIO   |         | captive      | 2014 | SRR10852985 |
| Phodilus badius              | Oriental Bay Owl            | Tytonidae         | Strigiformes        | TPB    |         | captive      | 2016 | SRR10852984 |
| Phoebastria immutabilis      | Laysan Albatross            | Diomedidae        | Procellariiformes   | UWBM   | 65657   | USA          |      | SRR10852983 |
| Phonygamus keraudrenii       | Trumpet Manucode            | Paradisaeidae     | Passeriformes       | ANWC   | B43000  | Australia    |      | SRR10852982 |
| Phoenicurus ochrurus         | Black Redstart              | Muscicapidae      | Passeriformes       | MPIO   |         | Germany      | 2010 | SRR10852981 |
| Phoenicopterus roseus        | Greater Flamingo            | Phoenicopteridae  | Phoenicopteriformes | WZS    |         | captive      | 2016 | SRR10852980 |
| Phylidonyris novaehollandiae | New Holland Honeyeater      | Meliphagidae      | Passeriformes       | MPIO   |         | missing      | 2010 | SRR10852978 |
| Phylloscopus umbroviens      | Brown Woodland Warbler      | Phylloscopidae    | Passeriformes       | CGN    |         | South Sudar  | 2010 | SRR10852977 |
| Picathartes gymnocephalus    | White-necked Picathartes    | Picathartidae     | Passeriformes       | LSUMNS | B-19213 | captive      |      | SRR10852976 |
| Picus viridis                | European Green Woodpecker   | Picidae           | Piciformes          | MPIO   |         | Germany      | 2017 | SRR10852975 |
| Pitta versicolor             | Noisy Pitta                 | Pittidae          | Passeriformes       | ANWC   | B31463  | Australia    |      | SRR10852974 |
| Platysteira castanea         | Chestnut Wattle-eye         | Platysteiridae    | Passeriformes       | CGN    |         | South Sudar  | 2010 | SRR10852973 |
| Platylophus galericulatus    | Crested Jay                 | Platylophidae     | Passeriformes       | LSUMNS | B-38663 | Malaysia     |      | SRR10852972 |
| Plectropterus gambensis      | Spur-winged Goose           | Anatidae          | Anseriformes        | CLB    |         | captive      | 2016 | SRR10852971 |
| Ploceus bicolor              | Dark-backed Weaver          | Ploceidae         | Passeriformes       | MPIO   |         | South Africa | 2011 | SRR10852970 |
| Plocepasser mahali           | White-browed Sparrow-Weaver | Ploceidae         | Passeriformes       | MPIO   |         | South Africa | 2017 | SRR10852969 |
| Pluvianus aegyptius          | Egyptian Plover             | Pluvianidae       | Charadriiformes     | CLB    |         | captive      | 2016 | SRR10852967 |
| Podiceps nigricollis         | Black-necked Grebe          | Podicipedidae     | Podicipediformes    | WZS    |         | captive      | 2015 | SRR10852966 |
| Podargus strigoides          | Tawny Frogmouth             | Podargidae        | Caprimulgiformes    | ANWC   | B55784  | Australia    |      | SRR10852965 |
| Poephila acuticauda          | Violet-eared Waxbill        | Estrildidae       | Passeriformes       | MPIO   |         | captive      | 2015 | SRR10852964 |

|                            |                                  |                  |                   |        |             |              |             |             |
|----------------------------|----------------------------------|------------------|-------------------|--------|-------------|--------------|-------------|-------------|
| Poecile montanus           | Willow Tit                       | Paridae          | Passeriformes     | MPIO   | Germany     | 2017         | SRR10852963 |             |
| Poecile palustris          | Marsh Tit                        | Paridae          | Passeriformes     | MPIO   | Germany     | 2017         | SRR10852962 |             |
| Poephila personata         | Masked Finch                     | Estrildidae      | Passeriformes     | MPIO   | captive     | 2015         | SRR10852961 |             |
| Pogonius atroflavus        | Red-rumped Tinkerbird            | Lybiidae         | Piciformes        | MPIO   | captive     | 2016         | SRR10852960 |             |
| Pogonius bilineatus        | Yellow-rumped Tinkerbird         | Lybiidae         | Piciformes        | CGN    | South Sudar | 2010         | SRR10852959 |             |
| Polioptila albiloris       | White-lored Gnatcatcher          | Poliophtilidae   | Passeriformes     | LSUMNS | B60746      | Honduras     | SRR10852958 |             |
| Pomatostomus superciliosus | White-browed Babbler             | Pomatostomidae   | Passeriformes     | ANWC   | B29279      | Australia    | SRR10852956 |             |
| Prionops plumatus          | White-crested Helmetshrike       | Prionopidae      | Passeriformes     | UWBM   | 110339      | Malawi       | 2001        | SRR10852955 |
| Promerops cafer            | Cape Sugarbird                   | Promeropidae     | Passeriformes     | MPIO   |             | South Africa | 2005        | SRR10852954 |
| Prunella modularis         | Dunnock                          | Prunellidae      | Passeriformes     | MPIO   |             | Germany      | 2017        | SRR10852953 |
| Psittacus erithacus        | Grey Parrot                      | Psittacidae      | Psittaciformes    | MPIO   |             | captive      | 2015        | SRR10852952 |
| Psilopogon pyrolophus      | Fire-tufted Barbet               | Megalaimidae     | Piciformes        | ZGK    |             | captive      | 2015        | SRR10852951 |
| Psophia crepitans          | Grey-winged Trumpeter            | Psophiidae       | Gruiformes        | ZGK    |             | captive      | 2015        | SRR10852950 |
| Psophodes olivaceus        | Eastern Whipbird                 | Psophodidae      | Passeriformes     | ANWC   | B43472      | Australia    | SRR10852949 |             |
| Pterodroma barau           | Barau's Petrel                   | Procellariidae   | Procellariiformes | ULR    |             | France       | 2010        | SRR10852948 |
| Pteruthius flaviscapis     | Pied Shrike-Babbler              | Vireonidae       | Passeriformes     | CGN    |             | Indonesia    | 2018        | SRR10852947 |
| Pterotochos megapodius     | Moustached Turca                 | Rhinocryptidae   | Passeriformes     | MNHNC  |             | Chile        |             | SRR10852945 |
| Pterocles orientalis       | Black-bellied Sandgrouse         | Pteroclididae    | Pteroclidiformes  | NARC   |             | UAR          | 2016        | SRR10852944 |
| Ptiloris magnificus        | Magnificent Riflebird            | Paradisaeidae    | Passeriformes     | ANWC   | B43100      | Australia    |             | SRR10852943 |
| Pycnonotus xanthopygus     | White-spectacled Bulbul          | Pycnonotidae     | Passeriformes     | WZS    |             | captive      | 2015        | SRR10852942 |
| Pyrrhula pyrrhula          | Eurasian Bullfinch               | Fringillidae     | Passeriformes     | MPIO   |             | Germany      | 2017        | SRR10852941 |
| Pytilia phoenicoptera      | Red-winged Pytilia               | Estrildidae      | Passeriformes     | MPIO   |             | captive      | 2015        | SRR10852940 |
| Ramphocelus carbo          | Silver-beaked Tanager            | Thraupidae       | Passeriformes     | UFPB   |             | Brazil       | 2011        | SRR10852939 |
| Ramphastos toco            | Toco Toucan                      | Ramphastidae     | Piciformes        | WZS    |             | captive      | 2015        | SRR10852938 |
| Regulus regulus            | Goldcrest                        | Regulidae        | Passeriformes     | MPIO   |             | Germany      | 2017        | SRR10852937 |
| Remiz pendulinus           | Eurasian Penduline Tit           | Remizidae        | Passeriformes     | MPIO   |             | captive      | 2016        | SRR10852936 |
| Rhagologus leucostigma     | Mottled Whistler                 | Rhagologidae     | Passeriformes     | MVM    | Z43546      | Papua NG     |             | SRR10852934 |
| Rhea americana             | Greater Rhea                     | Rheidae          | Struthioniformes  | UFPB   |             | captive      | 2012        | SRR10852933 |
| Rhinoptilus africanus      | Double-banded Courser            | Glareolidae      | Charadriiformes   | THH    |             | captive      | 2016        | SRR10852932 |
| Rhipidura atra             | Black Fantail                    | Rhipiduridae     | Passeriformes     | CGN    |             | Indonesia    | 2018        | SRR10852931 |
| Rhinopomastus cyanomelas   | Common Scimitarbill              | Phoeniculidae    | Bucerotiformes    | LSUMNS | B-34251     | South Africa |             | SRR10852930 |
| Rhipidura leucophrys       | Willie Wagtail                   | Rhipiduridae     | Passeriformes     | ANWC   | B29181      | Australia    |             | SRR10852929 |
| Rhynochetos jubatus        | Kagu                             | Rhynochetidae    | Eurypygiformes    | TUM    |             | New Caledo   | 2010        | SRR10852928 |
| Rostratula benghalensis    | Greater Painted Snipe            | Rostratulidae    | Charadriiformes   | CKC    |             | captive      | 2011        | SRR10852927 |
| Sagittarius serpentarius   | Secretarybird                    | Sagittariidae    | Accipitriformes   | TPB    |             | captive      | 2016        | SRR10852926 |
| Sakesphorus canadensis     | Black-crested Antshrike          | Thamnophilidae   | Passeriformes     | UFPB   |             | Brazil       | 2011        | SRR10852925 |
| Sapayoa aenigma            | Broad-billed Sapayoa             | Sapayoidae       | Passeriformes     | LSUMNS | B-2330      | Panama       |             | SRR10852923 |
| Schiffornis veraepacis     | Northern Schiffornis             | Tityridae        | Passeriformes     | LSUMNS | B-60681     | Honduras     |             | SRR10852922 |
| Scopus umbretta            | Hamerkop                         | Scopidae         | Pelecaniformes    | TPB    |             | captive      | 2016        | SRR10852921 |
| Scytalopus choocoensis     | Choco Tapaculo                   | Rhinocryptidae   | Passeriformes     | LSUMNS | B-11960     | Ecuador      |             | SRR10852920 |
| Seiurus aurocapillus       | Ovenbird                         | Parulidae        | Passeriformes     | UWBM   | 69381       | Nicaragua    |             | SRR10852919 |
| Semornis frantzii          | Prong-billed Barbet              | Semornithidae    | Piciformes        | LSUMNS | B-16016     | Costa Rica   |             | SRR10852918 |
| Serinus canaria            | Atlantic Canary                  | Fringillidae     | Passeriformes     | MPIO   |             | Spain        | 2001        | SRR10852917 |
| Serinus serinus            | European Serin                   | Fringillidae     | Passeriformes     | MPIO   |             | Germany      | 2017        | SRR10852916 |
| Sitta europaea             | Eurasian Nuthatch                | Sittidae         | Passeriformes     | MPIO   |             | Germany      | 2017        | SRR10852915 |
| Spermophaga haematina      | Western Bluebill                 | Estrildidae      | Passeriformes     | LSUMNS | B-45304     | Ghana        |             | SRR10852914 |
| Spizella passerina         | Chipping Sparrow                 | Passerellidae    | Passeriformes     | UWBM   | 118304      | USA          | 2014        | SRR10852912 |
| Stagonopleura guttata      | Diamond Firetail                 | Estrildidae      | Passeriformes     | MPIO   |             | captive      | 2015        | SRR10852911 |
| Steatornis caripensis      | Oilbird                          | Steatornithidae  | Caprimulgiformes  | LSUMNS | B-40597     | Peru         |             | SRR10852910 |
| Vidua interjecta           | Long-tailed Paradise Whydah      | Viduidae         | Passeriformes     | WZS    |             | captive      | 2015        | SRR10852909 |
| Stenostira scita           | Fairy Flycatcher                 | Stenostiridae    | Passeriformes     | UWBM   | 52729       | South Africa | 1994        | SRR10852908 |
| Stercorarius skua          | Great Skua                       | Stercorariidae   | Charadriiformes   | MfN    |             | Germany      |             | SRR10852907 |
| Struthio camelus           | Common Ostrich                   | Struthionidae    | Struthioniformes  | MPIO   |             | captive      | 2012        | SRR10852906 |
| Struthidea cinerea         | Apostlebird                      | Struthideidae    | Passeriformes     | ANWC   | B51697      | Australia    |             | SRR10852905 |
| Streptopelia risoria       | African Collared Dove            | Columbidae       | Columbiformes     | MPIO   |             | captive      | 2015        | SRR10852904 |
| Strix nebulosa             | Great Grey Owl                   | Strigidae        | Strigiformes      | WZS    |             | captive      | 2015        | SRR10852903 |
| Sylvia atricapilla         | Eurasian Blackcap                | Sylviidae        | Passeriformes     | MPIO   |             | Germany      | 2017        | SRR10852901 |
| Sylvietta leucophrys       | White-browed Crombec             | Macrosphenidae   | Passeriformes     | CGN    |             | South Sudar  | 2010        | SRR10852900 |
| Tachybaptus ruficollis     | Little Grebe                     | Podicipedidae    | Podicipediformes  | AI     |             | captive      | 2016        | SRR10852899 |
| Taeniopygia guttata        | Zebra Finch                      | Estrildidae      | Passeriformes     | MPIO   |             | captive      | 2015        | SRR10852898 |
| Terpsiphone rufiventer     | Black-headed Paradise-Flycatcher | Monarchidae      | Passeriformes     | CKC    |             | captive      | 2011        | SRR10852897 |
| Thalassoica antarctica     | Antarctic Petrel                 | Procellariidae   | Procellariiformes | UW     |             | captive      |             | SRR10852896 |
| Thalassornis leucotis      | White-backed Duck                | Anatidae         | Anseriformes      | CLB    |             | captive      | 2016        | SRR10852895 |
| Thamnophilus palliatus     | Chestnut-backed Antshrike        | Thamnophilidae   | Passeriformes     | UFPB   |             | Brazil       | 2011        | SRR10852894 |
| Threnetes leucurus         | Pale-tailed Barbthroat           | Trochilidae      | Caprimulgiformes  | UFPB   |             | Brazil       | 2011        | SRR10852893 |
| Tichodroma muraria         | Wallcreeper                      | Tichodromidae    | Passeriformes     | AI     |             | captive      | 2016        | SRR10852892 |
| Timalia pileata            | Chestnut-capped Babbler          | Timalidae        | Passeriformes     | CGN    |             | Indonesia    | 2018        | SRR10852890 |
| Todus mexicanus            | Puerto Rican Tody                | Todidae          | Coraciiformes     | LSUMNS | B-16815     | Puerto Rico  |             | SRR10852889 |
| Toxorhamphus poliopterus   | Slaty-headed Longbill            | Melanocharitidae | Passeriformes     | CGN    |             | Indonesia    | 2018        | SRR10852888 |
| Trichoglossus moluccanus   | Rainbow Lorikeet                 | Psittacidae      | Psittaciformes    | MPIO   |             | captive      | 2015        | SRR10852887 |
| Tringa totanus             | Common Redshank                  | Scolopacidae     | Charadriiformes   | WZS    |             | captive      | 2015        | SRR10852886 |
| Trogon surrucura           | Surucua Trogon                   | Trogonidae       | Trogoniformes     | UFPB   |             | Brazil       | 2011        | SRR10852885 |
| Troglodytes troglodytes    | Winter Wren                      | Troglodytidae    | Passeriformes     | MPIO   |             | Germany      | 2017        | SRR10852884 |
| Turnix suscitator          | Barred Buttonquail               | Turnicidae       | Charadriiformes   | MPIO   |             | captive      | 2010        | SRR10852883 |
| Upupa epops                | Eurasian Hoopoe                  | Upupidae         | Bucerotiformes    | WZS    |             | captive      | 2015        | SRR10852882 |
| Uraeginthus bengalus       | Red-cheeked Cordon-bleu          | Estrildidae      | Passeriformes     | MPIO   |             | captive      | 2010        | SRR10852881 |
| Uraeginthus cyanocephalus  | Blue-capped Cordon-bleu          | Estrildidae      | Passeriformes     | MPIO   |             | captive      | 2010        | SRR10852878 |

|                               |                          |               |                 |        |         |  |            |      |             |
|-------------------------------|--------------------------|---------------|-----------------|--------|---------|--|------------|------|-------------|
| <i>Urocolius macrourus</i>    | Blue-naped Mousebird     | Coliidae      | Coliiformes     | ZGB    |         |  | captive    | 2015 | SRR10852877 |
| <i>Urosphena squameiceps</i>  | Asian Stubtail           | Scotocercidae | Passeriformes   | UWBM   | 47107   |  | Russia     | 1993 | SRR10852876 |
| <i>Vanellus coronatus</i>     | Crowned Lapwing          | Charadriidae  | Charadriiformes | ZGK    |         |  | captive    | 2015 | SRR10852875 |
| <i>Vireo gilvus</i>           | Warbling Vireo           | Vireonidae    | Passeriformes   | UWBM   | 117518  |  | USA        |      | SRR10852874 |
| <i>Zeledonia coronata</i>     | Wrenthrush               | Zeledoniidae  | Passeriformes   | LSUMNS | B-19938 |  | Costa Rica |      | SRR10852873 |
| <i>Geokichla dohertyi</i>     | Chestnut-backed Thrush   | Turdidae      | Passeriformes   | ZGK    |         |  | captive    | 2015 | SRR10852872 |
| <i>Zosterops senegalensis</i> | African Yellow White-eye | Zosteropidae  | Passeriformes   | MPIO   |         |  | captive    | 2016 | SRR10852871 |

## B. Previously Published Transcriptomes

|                               |                            |                |                   |  |  |  |  |  |            |
|-------------------------------|----------------------------|----------------|-------------------|--|--|--|--|--|------------|
| <i>Acanthis flammea</i>       | Common Redpoll             | Fringillidae   | Passeriformes     |  |  |  |  |  | SRR1531388 |
| <i>Acanthis hornemanni</i>    | Arctic Redpoll             | Fringillidae   | Passeriformes     |  |  |  |  |  | SRR1531389 |
| <i>Accipiter virgatus</i>     | Besra                      | Accipitridae   | Accipitriformes   |  |  |  |  |  | SRR3203234 |
| <i>Aegyptus monachus</i>      | Cinereous Vulture          | Accipitridae   | Accipitriformes   |  |  |  |  |  | SRR3203236 |
| <i>Aerodramus fuciphagus</i>  | Edible-nest Swiftlet       | Apodidae       | Caprimulgiformes  |  |  |  |  |  | SRR4428213 |
| <i>Aerodramus maximus</i>     | Black-nest Swiftlet        | Apodidae       | Caprimulgiformes  |  |  |  |  |  | SRR4116895 |
| <i>Alectoris rufa</i>         | Red-legged Partridge       | Phasianidae    | Galliformes       |  |  |  |  |  | SRR2089995 |
| <i>Anas platyrhynchos</i>     | Mallard                    | Anatidae       | Anseriformes      |  |  |  |  |  | SRR1796022 |
| <i>Anser cygnoides</i>        | Swan Goose                 | Anatidae       | Anseriformes      |  |  |  |  |  | SRR1796012 |
| <i>Apteryx owenii</i>         | Little Spotted Kiwi        | Apterygidae    | Struthioniformes  |  |  |  |  |  | SRR3480320 |
| <i>Apteryx rowi</i>           | Okarito Kiwi               | Apterygidae    | Struthioniformes  |  |  |  |  |  | SRR3486434 |
| <i>Apus affinis</i>           | Little Swift               | Apodidae       | Caprimulgiformes  |  |  |  |  |  | SRR4107077 |
| <i>Aquila chrysaetos</i>      | Golden Eagle               | Accipitridae   | Accipitriformes   |  |  |  |  |  | SRR1818011 |
| <i>Arborophila rufipectus</i> | Sichuan Partridge          | Phasianidae    | Galliformes       |  |  |  |  |  | SRR6382407 |
| <i>Archilochus colubris</i>   | Ruby-throated Hummingbird  | Trochilidae    | Caprimulgiformes  |  |  |  |  |  | SRR6148275 |
| <i>Asio otus</i>              | Long-eared Owl             | Strigidae      | Strigiformes      |  |  |  |  |  | SRR3203220 |
| <i>Athene noctua</i>          | Little Owl                 | Strigidae      | Strigiformes      |  |  |  |  |  | SRR3203242 |
| <i>Bubo bubo</i>              | Eurasian Eagle-Owl         | Strigidae      | Strigiformes      |  |  |  |  |  | SRR3203225 |
| <i>Butastur indicus</i>       | Grey-faced Buzzard         | Accipitridae   | Accipitriformes   |  |  |  |  |  | SRR3203233 |
| <i>Buteo buteo</i>            | Common Buzzard             | Accipitridae   | Accipitriformes   |  |  |  |  |  | ERR441002  |
| <i>Cairina moschata</i>       | Muscovy Duck               | Anatidae       | Anseriformes      |  |  |  |  |  | SRR6367503 |
| <i>Calidris pugnax</i>        | Ruff                       | Scolopacidae   | Charadriiformes   |  |  |  |  |  | ERR1018145 |
| <i>Calypte anna</i>           | Anna's Hummingbird         | Trochilidae    | Caprimulgiformes  |  |  |  |  |  | SRR029422  |
| <i>Catharus ustulatus</i>     | Swainson's Thrush          | Turdidae       | Passeriformes     |  |  |  |  |  | SRR4340342 |
| <i>Chrysolophus pictus</i>    | Golden Pheasant            | Phasianidae    | Galliformes       |  |  |  |  |  | SRR3583129 |
| <i>Circus melanoleucos</i>    | Pied Harrier               | Accipitridae   | Accipitriformes   |  |  |  |  |  | SRR3203217 |
| <i>Columba livia</i>          | Common Pigeon              | Columbidae     | Columbiformes     |  |  |  |  |  | SRR2094789 |
| <i>Corvus corone</i>          | Carion Crow                | Corvidae       | Passeriformes     |  |  |  |  |  | SRR947793  |
| <i>Corvus macrorhynchos</i>   | Large-billed Crow          | Corvidae       | Passeriformes     |  |  |  |  |  | SRR1023635 |
| <i>Coturnix japonica</i>      | Japanese Quail             | Phasianidae    | Galliformes       |  |  |  |  |  | SRR1758120 |
| <i>Cyanistes caeruleus</i>    | Blue Tit                   | Paridae        | Passeriformes     |  |  |  |  |  | SRR2040636 |
| <i>Cyanopica cyanus</i>       | Azure-winged Magpie        | Corvidae       | Passeriformes     |  |  |  |  |  | SRR1917029 |
| <i>Elanus caeruleus</i>       | Black-winged Kite          | Accipitridae   | Accipitriformes   |  |  |  |  |  | SRR3203227 |
| <i>Emberiza melanocephala</i> | Black-headed Bunting       | Emberizidae    | Passeriformes     |  |  |  |  |  | SRR6207197 |
| <i>Eudyptes chrysocome</i>    | Rockhopper Penguin         | Spheniscidae   | Sphenisciformes   |  |  |  |  |  | SRR1324932 |
| <i>Eudyptes chrysolophus</i>  | Macaroni Penguin           | Spheniscidae   | Sphenisciformes   |  |  |  |  |  | SRR5253661 |
| <i>Eudyptes filholi</i>       | Eastern Rockhopper Penguin | Spheniscidae   | Sphenisciformes   |  |  |  |  |  | SRR1324928 |
| <i>Falco subbuteo</i>         | Eurasian Hobby             | Falconidae     | Falconiformes     |  |  |  |  |  | SRR3203238 |
| <i>Falco tinnunculus</i>      | Common Kestrel             | Falconidae     | Falconiformes     |  |  |  |  |  | SRR3203231 |
| <i>Ficedula albicollis</i>    | Collared Flycatcher        | Muscicapidae   | Passeriformes     |  |  |  |  |  | ERR168848  |
| <i>Gallinago media</i>        | Great Snipe                | Scolopacidae   | Charadriiformes   |  |  |  |  |  | SRR609950  |
| <i>Gallus gallus</i>          | Red Junglefowl             | Phasianidae    | Galliformes       |  |  |  |  |  | SRR4040241 |
| <i>Haemorhous mexicanus</i>   | House Finch                | Fringillidae   | Passeriformes     |  |  |  |  |  | SRR768509  |
| <i>Junco hyemalis</i>         | Dark-eyed Junco            | Passerellidae  | Passeriformes     |  |  |  |  |  | SRR1759140 |
| <i>Lamprolornis superbis</i>  | Superb Starling            | Sturnidae      | Passeriformes     |  |  |  |  |  | SRR1565487 |
| <i>Lepidothrix coronata</i>   | Blue-crowned Manakin       | Pipridae       | Passeriformes     |  |  |  |  |  | SRR3493972 |
| <i>Leucophaeus atricilla</i>  | Laughing Gull              | Laridae        | Charadriiformes   |  |  |  |  |  | SRR3218020 |
| <i>Loxia curvirostra</i>      | Red Crossbill              | Fringillidae   | Passeriformes     |  |  |  |  |  | SRR834578  |
| <i>Lyrurus tetrrix</i>        | Black Grouse               | Phasianidae    | Galliformes       |  |  |  |  |  | SRR208078  |
| <i>Macronectes giganteus</i>  | Southern Giant Petrel      | Procellariidae | Procellariiformes |  |  |  |  |  | SRR6902605 |
| <i>Malurus lamberti</i>       | Variagated Fairywren       | Maluridae      | Passeriformes     |  |  |  |  |  | SRR3901709 |
| <i>Meleagris gallopavo</i>    | Wild Turkey                | Phasianidae    | Galliformes       |  |  |  |  |  | SRR1796090 |
| <i>Melospiza undulatus</i>    | Budgerigar                 | Psittacidae    | Psittaciformes    |  |  |  |  |  | SRR5336547 |
| <i>Melospiza melodia</i>      | Song Sparrow               | Passerellidae  | Passeriformes     |  |  |  |  |  | SRR1198303 |
| <i>Nesoptilotis leucotis</i>  | White-eared Honeyeater     | Meliphagidae   | Passeriformes     |  |  |  |  |  | SRR3901721 |
| <i>Nothoprocta perdicaria</i> | Chilean Tinamou            | Tinamidae      | Struthioniformes  |  |  |  |  |  | SRR6713504 |
| <i>Oenanthe oenanthe</i>      | Northern Wheatear          | Muscicapidae   | Passeriformes     |  |  |  |  |  | SRR6054179 |
| <i>Otus bakkamoena</i>        | Collared Scops Owl         | Strigidae      | Strigiformes      |  |  |  |  |  | SRR3203243 |
| <i>Otus scops</i>             | Eurasian Scops Owl         | Strigidae      | Strigiformes      |  |  |  |  |  | SRR3203230 |
| <i>Pandion haliaetus</i>      | Osprey                     | Pandionidae    | Accipitriformes   |  |  |  |  |  | SRR3218042 |
| <i>Patagioenas fasciata</i>   | Band-tailed Pigeon         | Columbidae     | Columbiformes     |  |  |  |  |  | SRR3146192 |
| <i>Phasianus colchicus</i>    | Common Pheasant            | Phasianidae    | Galliformes       |  |  |  |  |  | SRR1797835 |
| <i>Phylloscopus trochilus</i> | Northern Willow Warbler    | Phylloscopidae | Passeriformes     |  |  |  |  |  | SRR528728  |
| <i>Phylloscopus trochilus</i> | Willow Warbler             | Phylloscopidae | Passeriformes     |  |  |  |  |  | SRR529891  |
| <i>Picus canus</i>            | Grey-headed Woodpecker     | Picidae        | Piciformes        |  |  |  |  |  | SRR3203240 |
| <i>Pipra filicauda</i>        | Wire-tailed Manakin        | Pipridae       | Passeriformes     |  |  |  |  |  | SRR6811836 |
| <i>Platycercus eximius</i>    | Eastern Rosella            | Psittacidae    | Psittaciformes    |  |  |  |  |  | SRR3901724 |

|                        |                            |               |                 |            |
|------------------------|----------------------------|---------------|-----------------|------------|
| Poecile atricapillus   | Black-capped Chickadee     | Paridae       | Passeriformes   | SRR6255696 |
| Pseudopodoces humilis  | Ground Tit                 | Paridae       | Passeriformes   | SRR768235  |
| Pygoscelis adeliae     | Adelie Penguin             | Spheniscidae  | Sphenisciformes | SRR5253662 |
| Pygoscelis papua       | Gentoo Penguin             | Spheniscidae  | Sphenisciformes | SRR2980760 |
| Sericornis frontalis   | White-browed Scrubwren     | Acanthizidae  | Passeriformes   | SRR3901710 |
| Sinosuthora webbiana   | Vinous-throated Parrotbill | Sylviidae     | Passeriformes   | SRR392516  |
| Spinus spinus          | Eurasian Siskin            | Fringillidae  | Passeriformes   | SRR1551785 |
| Spinus tristis         | American Goldfinch         | Fringillidae  | Passeriformes   | SRR6255718 |
| Sturnus vulgaris       | Common Starling            | Sturnidae     | Passeriformes   | SRR3990508 |
| Syrnaticus mikado      | Mikado Pheasant            | Phasianidae   | Galliformes     | SRR5666071 |
| Tyto longimembris      | Eastern Grass Owl          | Tytonidae     | Strigiformes    | SRR3203222 |
| Uraeginthus granatina  | Violet-eared Waxbill       | Estrildidae   | Passeriformes   | SRR955502  |
| Zonotrichia albicollis | White-throated Sparrow     | Passerellidae | Passeriformes   | SRR3115424 |

### C. Sequenced Genomes (MPIO)

|                           |                          |                 |                 |      |             |              |      |             |
|---------------------------|--------------------------|-----------------|-----------------|------|-------------|--------------|------|-------------|
| Erythrocerus livingstonei | Livingstone's Flycatcher | Erythrocercidae | Passeriformes   | UWBM | 106107      | Malawi       | 2001 | SRR10852870 |
| Eulacostoma nigropectus   | Wattled Ploughbill       | Eulacostomidae  | Passeriformes   | MVM  | Z42739      | P New Guinea |      | SRR10852869 |
| Hyltiota australis        | Southern Hyltiota        | Hyltiotidae     | Passeriformes   | UWBM | 106011      | Malawi       | 2001 | SRR10852867 |
| Ibidorhyncha struthersii  | Ibisbill                 | Ibidorhynchidae | Charadriiformes | LMSU | R-138111 ID | Kazakhstan   | 1957 | SRR10852866 |
| Pluvianellus socialis     | Magellanic Plover        | Pluvianellidae  | Charadriiformes | MACN | Ot-ct 210   | Argentina    |      | SRR10852865 |
| Ptilorhoa leucosticta     | Spotted Jewel-Babbler    | Cinclosomatidae | Passeriformes   | ANWC | B52548      | P New Guin   | 2009 | SRR10852864 |
| Pnoepyga pusilla          | Pygmy Wren-Babbler       | Pnoepygidae     | Passeriformes   | CGN  |             | Indonesia    |      | SRR10852863 |

### D. Previously Published Genomes

|                            |                            |                   |                     |  |  |  |  |                              |
|----------------------------|----------------------------|-------------------|---------------------|--|--|--|--|------------------------------|
| Acanthisitta chloris       | Rifleman                   | Acanthisittidae   | Passeriformes       |  |  |  |  | ASM69581v1                   |
| Alligator mississippiensis | American alligator         | Alligatoridae     | Crocodylians        |  |  |  |  | ASM28112v4                   |
| Alligator sinensis         | Chinese alligator          | Alligatoridae     | Crocodylians        |  |  |  |  | ASM45574v1                   |
| Anas platyrhynchos         | Mallard                    | Anatidae          | Anseriformes        |  |  |  |  | BGI_duck_1.0                 |
| Antrostomus carolinensis   | Chuck-will's-widow         | Caprimulgidae     | Caprimulgiformes    |  |  |  |  | ASM70074v1                   |
| Apaloderma vittatum        | Bar-tailed Trogon          | Trogonidae        | Trogoniformes       |  |  |  |  | ASM70340v1                   |
| Aptenodytes forsteri       | Emperor Penguin            | Spheniscidae      | Sphenisciformes     |  |  |  |  | ASM69914v1                   |
| Aquila chrysaetos          | Golden Eagle               | Accipitridae      | Accipitriformes     |  |  |  |  | Aquila_chrysaetos-1.0.2      |
| Ara macao                  | Scarlet Macaw              | Psittacidae       | Psittaciformes      |  |  |  |  | SMAcV.1                      |
| Athene cucularia           | Burrowing Owl              | Strigidae         | Strigiformes        |  |  |  |  | athCun1                      |
| Balearica regulorum        | Grey Crowned Crane         | Gruidae           | Gruiformes          |  |  |  |  | ASM70989v1                   |
| Buceros rhinoceros         | Rhinoceros Hornbill        | Bucerotidae       | Bucerotiformes      |  |  |  |  | ASM71030v1                   |
| Calypte anna               | Anna's Hummingbird         | Trochilidae       | Caprimulgiformes    |  |  |  |  | ASM69908v1                   |
| Cariama cristata           | Red-legged Seriema         | Cariamidae        | Cariamiformes       |  |  |  |  | ASM69053v1                   |
| Cathartes aura             | Turkey Vulture             | Cathartidae       | Cathartiformes      |  |  |  |  | ASM69994v1                   |
| Chaetura pelagica          | Chimney Swift              | Apodidae          | Caprimulgiformes    |  |  |  |  | ChaPel_1.0                   |
| Charadrius vociferus       | Killdeer                   | Charadriidae      | Charadriiformes     |  |  |  |  | ASM70802v2                   |
| Chlamydotis macqueenii     | Macqueen's Bustard         | Otididae          | Otidiformes         |  |  |  |  | ASM69519v1                   |
| Colinus striatus           | Speckled Mousebird         | Coliidae          | Coliiformes         |  |  |  |  | ASM69071v1                   |
| Columba livia              | Common Pigeon              | Columbidae        | Columbiformes       |  |  |  |  | Cliv_1.0                     |
| Corvus brachyrhynchos      | American Crow              | Corvidae          | Passeriformes       |  |  |  |  | ASM69197v1                   |
| Corvus cornix              | Hooded Crow                | Corvidae          | Passeriformes       |  |  |  |  | Hooded_Crow                  |
| Cuculus canorus            | Common Cuckoo              | Cuculidae         | Cuculiformes        |  |  |  |  | ASM70932v1                   |
| Cyanistes caeruleus        | Blue Tit                   | Paridae           | Passeriformes       |  |  |  |  | cyaCae2                      |
| Egretta garzetta           | Little Egret               | Ardeidae          | Pelecaniformes      |  |  |  |  | ASM68718v1                   |
| Eurypyga helias            | Sunbittern                 | Eurypygidae       | Eurypygiformes      |  |  |  |  | ASM69077v1                   |
| Falco cherrug              | Saker Falcon               | Falconidae        | Falconiformes       |  |  |  |  | F_cherrug_v1.0               |
| Falco peregrinus           | Peregrine Falcon           | Falconidae        | Falconiformes       |  |  |  |  | F_peregrinus_v1.0            |
| Ficedula albicollis        | Collared Flycatcher        | Muscicapidae      | Passeriformes       |  |  |  |  | FicAlb1.5                    |
| Fulmarus glacialis         | Northern Fulmar            | Procellariidae    | Procellariiformes   |  |  |  |  | ASM69083v1                   |
| Gallus gallus              | Red Junglefowl             | Phasianidae       | Galliformes         |  |  |  |  | Gallus_gallus-4.0            |
| Gavia stellata genome      | Red-throated Loon          | Gaviidae          | Gaviiformes         |  |  |  |  | ASM69087v1                   |
| Geospiza fortis            | Medium Ground Finch        | Thraupidae        | Passeriformes       |  |  |  |  | GeoFor_1.0                   |
| Haliaeetus albicilla       | White-tailed Eagle         | Accipitridae      | Accipitriformes     |  |  |  |  | ASM69140v1                   |
| Haliaeetus leucocephalus   | Bald Eagle                 | Accipitridae      | Accipitriformes     |  |  |  |  | Haliaeetus_leucocephalus-4.0 |
| Leptosomus discolor        | Cuckoo Roller              | Leptosomidae      | Leptosomiformes     |  |  |  |  | ASM69178v1                   |
| Meleagris gallopavo        | Wild Turkey                | Phasianidae       | Galliformes         |  |  |  |  | Turkey_2.01                  |
| Melopsittacus undulatus    | Budgerigar                 | Psittacidae       | Psittaciformes      |  |  |  |  | Melopsittacus_undulatus_6.3  |
| Merops nubicus             | Southern Carmine Bee-eater | Meropidae         | Coraciiformes       |  |  |  |  | ASM69184v1                   |
| Mesitornis unicolor        | Brown Mesite               | Mesitornithidae   | Mesitornithiformes  |  |  |  |  | ASM69576v1                   |
| Nestor notabilis           | Kea                        | Strigopidae       | Psittaciformes      |  |  |  |  | ASM69687v1                   |
| Nipponia nippon            | Crested Ibis               | Threskiornithidae | Pelecaniformes      |  |  |  |  | ASM70822v1                   |
| Opisthocomus hoazin        | Hoatzin                    | Opisthocomidae    | Opisthocomiformes   |  |  |  |  | ASM69207v1                   |
| Pelecanus crispus          | Dalmatian Pelican          | Pelecanidae       | Pelecaniformes      |  |  |  |  | ASM68737v1                   |
| Phaethon lepturus          | White-tailed Tropicbird    | Phaethontidae     | Phaethontiformes    |  |  |  |  | ASM68728v1                   |
| Phalacrocorax carbo        | Great Cormorant            | Phalacrocoracidae | Suliformes          |  |  |  |  | ASM70892v1                   |
| Phoenicopterus ruber       | American Flamingo          | Phoenicopteridae  | Phoenicopteriformes |  |  |  |  | ASM68726v1                   |
| Picoides pubescens         | Downy Woodpecker           | Picidae           | Piciformes          |  |  |  |  | ASM69900v1                   |
| Podiceps cristatus         | Great Crested Grebe        | Podicipedidae     | Podicipediformes    |  |  |  |  | ASM69954v1                   |
| Pseudopodoces humilis      | Ground Tit                 | Paridae           | Passeriformes       |  |  |  |  | PseHum1.0                    |
| Pterocles gutturalis       | Yellow-throated Sandgrouse | Pteroclididae     | Pteroclidiformes    |  |  |  |  | ASM69924v1                   |
| Pygoscelis adeliae         | Adelie Penguin             | Spheniscidae      | Sphenisciformes     |  |  |  |  | ASM69910v1                   |

|                        |                        |               |                  |                              |
|------------------------|------------------------|---------------|------------------|------------------------------|
| Serinus canaria        | Atlantic Canary        | Fringillidae  | Passeriformes    | SCA1                         |
| Struthio camelus       | Common Ostrich         | Struthionidae | Struthioniformes | ASM69896v1                   |
| Taeniopygia guttata    | Zebra Finch            | Estrildidae   | Passeriformes    | Taeniopygia_guttata-3.2.4    |
| Tauraco erythrolophus  | Red-crested Turaco     | Musophagidae  | Musophagiformes  | ASM70936v1                   |
| Tinamus guttatus       | White-throated Tinamou | Tinamidae     | Struthioniformes | ASM70537v2                   |
| Tyto alba              | Barn Owl               | Tytonidae     | Strigiformes     | ASM68720v1                   |
| Zonotrichia albicollis | White-throated Sparrow | Passerellidae | Passeriformes    | Zonotrichia_albicollis-1.0.1 |

## Institutes

|        |                                                                                              |
|--------|----------------------------------------------------------------------------------------------|
| AI     | Alpenzoo Innsbruck, Austria                                                                  |
| ANWC   | Australian National Wildlife Collection, CSIRO, Canberra, Australia                          |
| CGN    | Collection Gerhard Nikolaus, Germany                                                         |
| CKC    | Collection Kai Clausen, Germany                                                              |
| CLB    | Collection Ludger Bremehr, Verl, Germany                                                     |
| JGM    | Johannes Gutenberg-Universität Mainz, Germany                                                |
| LMO    | Landesmuseum Oldenburg, Germany                                                              |
| LMSU   | Lomonosov Moscow State University, Russia                                                    |
| LSUMNS | Louisiana State University Museum of Natural Science, Baton Rouge, USA                       |
| MACN   | Museo Argentino De Ciencias Naturales, Argentina                                             |
| MfN    | Museum für Naturkunde, Leibniz-Institut für Evolutions- und Biodiversitätsforschung, Germany |
| MNHNC  | Museo Nacional de Historia Natural, Chile                                                    |
| MPIO   | Max Planck Institute for Ornithology, Seewiesen, Germany                                     |
| MVM    | Museum Victoria Melbourne, Australia                                                         |
| NARC   | National Avian Research Center, Seihan, United Arab Emirates                                 |
| PINP   | Phillip Island Nature Parks, Cowes, Australia                                                |
| THH    | Tierpark Hagenbeck Hamburg, Germany                                                          |
| THM    | Tierpark Hellabrunn München, Germany                                                         |
| TPB    | Tierpark Berlin-Friedrichsfelde, Germany                                                     |
| TUM    | Technical University of Munich, Germany                                                      |
| UFPB   | Federal University of Para, Brazil                                                           |
| UG     | University of Giessen, Germany                                                               |
| UGP    | University of Gdansk, Poland                                                                 |
| ULR    | Université de La Réunion, Sainte Clotilde, France                                            |
| UPS    | Université Paris-Sud, Orsay, France                                                          |
| UV     | University of Vienna, Austria                                                                |
| UW     | Wageningen University and Research, The Netherlands                                          |
| UWBM   | University of Washington Burke Museum, Seattle, USA                                          |
| VPW    | Vogelpark Walsrode, Germany                                                                  |
| WSU    | Washington State University, Pullman, USA                                                    |
| WZS    | Wilhelma Zoologisch Botanischer Garten Stuttgart, Germany                                    |
| ZGB    | Zoologischer Garten Berlin, Germany                                                          |
| ZGK    | Zoologischer Garten Köln, Germany                                                            |
| ZGW    | Zoologischer Garten Wuppertal, Germany                                                       |
| ZH     | Zoo Heidelberg, Germany                                                                      |
| ZZ     | Zoo Zürich, Switzerland                                                                      |











**Tab. S2C****Assembled Genomes (MPIO)**

Species name

English species name

Family-level  
taxonOrder-level  
taxon

| BASIC STATISTICS |                      |                    | MULTIPLE ALIGNMENT ANALYSIS |                     |                     |                     |
|------------------|----------------------|--------------------|-----------------------------|---------------------|---------------------|---------------------|
| Contigs          | total length<br>[bp] | Contig<br>N50 [bp] | ref. 3'UTR<br>covered       | relative<br>to best | ref. CDS<br>covered | relative<br>to best |
| 240906           | 1111336811           | 31890              | 25014839                    | 79,6%               | 20815581            | 66,3%               |
| 147201           | 1092700062           | 42436              | 25338629                    | 80,7%               | 20873253            | 66,4%               |
| 468218           | 1231942596           | 10121              | 25093966                    | 79,9%               | 20861811            | 66,4%               |
| 222362           | 1282615657           | 28323              | 26947581                    | 85,8%               | 23579349            | 75,1%               |
| 192308           | 1215332984           | 20255              | 21763954                    | 69,3%               | 19943475            | 63,5%               |
| 385799           | 1161722018           | 13211              | 25249796                    | 80,4%               | 20849379            | 66,4%               |
| 397389           | 1210429367           | 9899               | 29676619                    | 94,5%               | 24383910            | 77,6%               |

Erythrocerus livingstonei

Livingstone's Flycatcher

Erythroceridae

Passeriformes

Eulacestoma nigropectus

Wattled Ploughbill

Eulacestomidae

Passeriformes

Hyliota australis

Southern Hyliota

Hyliotidae

Passeriformes

Ibidorhyncha struthersii

Ibisbill

Ibidorhynchidae

Charadriiformes

Pluvianellus socialis

Magellanic Plover

Pluvianellidae

Charadriiformes

Ptilorrhoa leucosticta

Spotted Jewel-Babbler

Cinclosomatidae

Passeriformes

Pnoepyga pusilla

Pygmy Wren-Babbler

Pnoepygidae

Passeriformes

**Tab. S2D**

**Statistical comparison of transcriptomes of brain,  
liver, blood, muscle and body tissues (Tab. S2A)**

**assembled transcripts**

|        | Analysis of variance | Least Sq Mean | Std Error | Mean    |
|--------|----------------------|---------------|-----------|---------|
| blood  | B                    | 41858,743     | 1478,797  | 41858,7 |
| body   | C                    | 32666,884     | 1458,858  | 32666,9 |
| brain  | A                    | 60042,488     | 2411,182  | 60042,5 |
| liver  | BC                   | 42572,25      | 3452,287  | 42572,3 |
| muscle | BC                   | 35297,182     | 3291,627  | 35297,2 |
| skin   | ABC                  | 51297         | 7684,615  | 51297   |

F(5, 302)=20.2135 P<.0001

**total length [bp]**

|        | Analysis of variance | Least Sq Mean | Std Error | Mean     |
|--------|----------------------|---------------|-----------|----------|
| blood  | B                    | 67998179      | 2747503   | 67998179 |
| body   | C                    | 47831832      | 2710456   | 47831832 |
| brain  | A                    | 109654112     | 4479809   | 1,1E+08  |
| liver  | BC                   | 61473431      | 6414111   | 61473431 |
| muscle | BC                   | 50796023      | 6115615   | 50796023 |
| skin   | AB                   | 89905660      | 14278960  | 89905660 |

F(5, 302)=30.1404 P<.0001

**transcript N50 [bp]**

|        | Analysis of variance | Least Sq Mean | Std Error | Mean    |
|--------|----------------------|---------------|-----------|---------|
| blood  | B                    | 2923,6422     | 57,71007  | 2923,64 |
| body   | C/D                  | 2062,0089     | 56,93192  | 2062,01 |
| brain  | A                    | 3356,6098     | 94,09638  | 3356,61 |
| liver  | C/CD                 | 2352,7        | 134,7255  | 2352,7  |
| muscle | C/D                  | 2113,6364     | 128,4557  | 2113,64 |
| skin   | ABC                  | 3090          | 299,9422  | 3090    |

F(5, 302)=41.4062 P<.0001

**complete genes**

|        | Analysis of variance | Least Sq Mean | Std Error | Mean  |
|--------|----------------------|---------------|-----------|-------|
| blood  | C                    | 0,457         | 0,015     | 0,457 |
| body   | C                    | 0,463         | 0,015     | 0,463 |
| brain  | A                    | 0,717         | 0,025     | 0,717 |
| liver  | B                    | 0,592         | 0,035     | 0,592 |
| muscle | BC                   | 0,512         | 0,034     | 0,512 |
| skin   | AB                   | 0,748         | 0,078     | 0,748 |

F(5, 302)=21.6775 P<.0001

**ref 3'UTR covered [bp]**

|        | Analysis of variance | Least Sq Mean | Std Error | Mean     |
|--------|----------------------|---------------|-----------|----------|
| blood  | C/D                  | 6777523       | 259863,4  | 6777523  |
| body   | BC/CD                | 7435366       | 256359,4  | 7435366  |
| brain  | A                    | 13410812      | 423707,7  | 13410812 |
| liver  | B/BC                 | 9070775       | 606657,1  | 9070775  |
| muscle | B/BC                 | 8602367       | 578424,9  | 8602367  |
| skin   | AB                   | 12552876      | 1350521   | 12552876 |

F(5, 302)=40.9262 P<.0001

**ref CDS covered [bp]**

|        | Analysis of variance | Least Sq Mean | Std Error | Mean     |
|--------|----------------------|---------------|-----------|----------|
| blood  | C/D                  | 8085368       | 279932,2  | 8085368  |
| body   | C/D                  | 7942934       | 276157,6  | 7942934  |
| brain  | A                    | 13527664      | 456430    | 13527664 |
| liver  | B/BC                 | 10188997      | 653508,3  | 10188997 |
| muscle | BC/CD                | 8738055       | 623095,7  | 8738055  |
| skin   | AB                   | 13594595      | 1454102   | 13594595 |

F(5, 302)=27.6908 P<.0001









# Tab. S3

Tab. S3A. TFBS - Family-level comparisons

| Higher Taxon         | Species and family-level taxon             | Higher Taxon            | Species and family-level taxon         |
|----------------------|--------------------------------------------|-------------------------|----------------------------------------|
| <i>Estrildidae</i>   | Amandava amandava Estrildidae              | <i>Charadriiformes</i>  | Actophilornis africanus Jacanidae      |
|                      | Clytospiza monteiri Estrildidae            |                         | Alle alle Alcidae                      |
|                      | Emblema pictum Estrildidae                 |                         | Burhinus capensis Burhinidae           |
|                      | Erythrura psittacea Estrildidae            |                         | Charadrius hiaticula Charadiidae       |
|                      | Euodice cantans Estrildidae                |                         | Chroicocephalus ridibundus Laridae     |
|                      | Heteromunia pectoralis Estrildidae         |                         | Dromas ardeola Dromadidae              |
|                      | Hypargos niveoguttatus Estrildidae         |                         | Himantopus himantopus Recurvirostridae |
|                      | Mandingoa nitidula Estrildidae             |                         | Philomachus pugnax Scolopacidae        |
|                      | Ortygospiza atricollis Estrildidae         |                         | Pluvianus aegyptus Pluvianidae         |
|                      | Spremophaga haematina Estrildidae          |                         | Vanellus coronatus Charadiidae         |
| <i>Fringillidae</i>  |                                            | <i>Caprimulgiformes</i> |                                        |
|                      | Acanthis flamea Fringillidae               |                         | Antrostomus carolinensis Caprimulgidae |
|                      | Carduelis cannabina Fringillidae           |                         | Calypte anna Trochilidae               |
|                      | Chloris chloris Fringillidae               |                         | Caprimulgus inornatus Caprimulgidae    |
|                      | Coccothraustes coccothraustes Fringillidae |                         | Chaetura pelagica Apodidae             |
|                      | fringilla coelebs Fringillidae             |                         | Florisuga fusca Trochilidae            |
|                      | Haemorhous mexicanus Fringillidae          |                         | Nyctibius grandis Nyctibiidae          |
|                      | Phyrrula phyrrula Fringillidae             |                         | Phaethornis ruber Trochilidae          |
|                      | Serinus canaria Fringillidae               |                         | Podargus strigoides Podargidae         |
|                      | Serinus serinus Fringillidae               |                         | Steatornis caripensis Steatornithidae  |
|                      | Spinus tristis Fringillidae                |                         | Threnetes leucurus Trochilidae         |
| <i>Basal Oscines</i> |                                            |                         |                                        |
|                      | Ailuroedus buccoides Ptilonorhynchidae     |                         |                                        |
|                      | Cinclosoma clarum Cinclosomatidae          |                         |                                        |
|                      | Climacteris picumnus Climacteridae         |                         |                                        |
|                      | Coracina novaehollandiae Campephagidae     |                         |                                        |
|                      | Gerygone flavolateralis Acanthizidae       |                         |                                        |
|                      | Malurus melanocephalus Maluridae           |                         |                                        |
|                      | Menura novaehollandiae Menuridae           |                         |                                        |
|                      | Pardalotus punctatus Pardalotidae          |                         |                                        |
|                      | Phylidonyris novaehollandiae Meliphagidae  |                         |                                        |
|                      | Pomatostomus superciliosus Pomatostomidae  |                         |                                        |

**Tab. S3B. List of genes of which 3'UTRs were used in TFBS Z-Score analysis (Fig. 1D).**

| <b>Gene Symbol</b>                 | <b>Sequence_SCA_ID</b> | <b>Gene Symbol</b> | <b>Sequence_SCA_ID</b> |
|------------------------------------|------------------------|--------------------|------------------------|
| FAM83H                             | SCA g 1033             | PMPCA              | SCA g 7965             |
| MAPK15                             | SCA g 1034             | FAM78A             | SCA g 8023             |
| THUMPD2                            | SCA g 1035             | AIF1L              | SCA g 8025             |
| ARHGAP39                           | SCA g 1036             | GPR107             | SCA g 8036             |
| 108962334                          | SCA g 1062             | YARS2              | SCA g 8884             |
| EEF1D                              | SCA g 1067             | SRP68              | SCA g 9220             |
| CYLD                               | SCA g 1069             | SPHK1              | SCA g 9227             |
| ZC3H3                              | SCA g 1072             | SSH2               | SCA g 9528             |
| CAP2                               | SCA g 1094             | GRPEL1             | SCA g 9790             |
| FAM8A1                             | SCA g 1095             | MAN2B2             | SCA g 9795             |
| TMEM14                             | SCA g 1113             | RBPJ               | SCA g 9863             |
| EEF1E1                             | SCA g 1122             | LNX1               | SCA g 9964             |
| RIOK1                              | SCA g 1129             | FRG1               | SCA g 10003            |
| RPP40                              | SCA g 1140             | SPOCK3             | SCA g 10070            |
| RIPK1                              | SCA g 1150             | INTS10             | SCA g 10160            |
| LOC108964730 (LOC108964730), ncRNA | SCA g 1157             | GRID2              | SCA g 10244            |
| UPF0711 protein C18orf21           | SCA g 1268             | LSM6               | SCA g 10287            |
| FAM206A                            | SCA g 1307             | MSRB3              | SCA g 10391            |
| USP14                              | SCA g 1443             | GOLT1B             | SCA g 10529            |
| CHD7                               | SCA g 1552             | SLC22A2            | SCA g 10604            |
| RRM2B                              | SCA g 1736             | RIT2               | SCA g 10753            |
| S1PR1                              | SCA g 2001             | PIK3C3             | SCA g 10758            |
| RPAP2                              | SCA g 2052             | CASZ1              | SCA g 10911            |
| CASK                               | SCA g 3305             | PPCS               | SCA g 11088            |
| NDUFA1                             | SCA g 4163             | C1orf95            | SCA g 11588            |
| SEPT6                              | SCA g 4165             | CNRIP1             | SCA g 11663            |
| SLC25A5                            | SCA g 4170             | TRMT5              | SCA g 11793            |
| IL1RAPL2                           | SCA g 4179             | ADCK1              | SCA g 11981            |
| ZC4H2                              | SCA g 4199             | DDB2               | SCA g 12273            |
| FAM155B                            | SCA g 4218             | MRPL21             | SCA g 12437            |
| IGBP1                              | SCA g 4223             | SH3GL1             | SCA g 13193            |
| PDZD11                             | SCA g 4229             | GAB1               | SCA g 13726            |
| CYSLTR1                            | SCA g 4233             | TULP3              | SCA g 13948            |
| P2RY10                             | SCA g 4237             | IRS2               | SCA g 14585            |
| RBM15B                             | SCA g 4906             | GALNTL2            | SCA g 15820            |
| MUSTN1                             | SCA g 4927             | MAN2C1             | SCA g 15990            |
| ABHD6                              | SCA g 4976             | COL4A3BP           | SCA g 16058            |
| FNTM2                              | SCA g 5420             | PURG               | SCA g 16263            |
| FAM20C                             | SCA g 5797             | ZBTB8A             | SCA g 16345            |
| AACS                               | SCA g 6438             | JAM3               | SCA g 16521            |
| RPS6KA2                            | SCA g 6569             | PDZD8              | SCA g 17533            |
| CAPN11                             | SCA g 6647             | DDX18              | SCA g 18454            |
| SLC35B2                            | SCA g 6651             | TTLL4              | SCA g 18550            |
| RAB23                              | SCA g 6950             | SLC40A1            | SCA g 18817            |
| BEND6                              | SCA g 6953             | ERBB4              | SCA g 18850            |
| TINAG                              | SCA g 6963             | RHOG               | SCA g 18982            |
| RAB41                              | SCA g 7288             | SEMA3G             | SCA g 19028            |
| DEPTOR                             | SCA g 7732             | EMC1               | SCA g 19137            |

# Tab. S4

## Comparison between molecular and fossil based age determination of avian higher clades

| order-level taxa  | family-level taxa              | stem/<br>crown | molecular<br>estimated<br>timing (Mya) | dated fossil<br>(Mya) | references                    |
|-------------------|--------------------------------|----------------|----------------------------------------|-----------------------|-------------------------------|
| Accipitriformes   | Accipitridae                   |                | 26                                     | 37                    | Mlíkovský (2002); Mayr (2017) |
| Accipitriformes   | Pandionidae                    | stem           | 32                                     | 36                    | Mlíkovský (2002); Mayr (2017) |
| Accipitriformes   | Sagittariidae                  | stem           | 43                                     | 30                    | Mlíkovský (2002); Mayr (2017) |
| Anseriformes      | Anseranatidae                  | stem           | 47                                     | 25                    | Worthy and Scanlon (2009)     |
| Anseriformes      | Anatidae                       |                | 32                                     | 34                    | Mayr (2017)                   |
| Anseriformes      | Anhimidae                      | stem           | 54                                     | 20-28                 | Mayr (2017)                   |
| Bucerotiformes    | stem-Upupidae                  | stem           | 52                                     | 47                    | Ksepka and Clarke (2015)      |
| Caprimulgiformes  | Apodidae                       | stem           | 47                                     | 51                    | Ksepka and Clarke (2015)      |
| Caprimulgiformes  | Trochilidae                    | stem           | 26                                     | 32                    | Mayr (2004)                   |
| Caprimulgiformes  | Nyctibiidae                    | stem           | 56                                     | 47                    | Mayr (2017)                   |
| Caprimulgiformes  | Podargidae                     | stem           | 58                                     | 47                    | Mayr (2017)                   |
| Caprimulgiformes  | Steatornithidae                | stem           | 56                                     | 51                    | Mayr (2017)                   |
| Cariamiformes     | Cariamidae                     | stem           | 65                                     | 47                    | Mayr (2017)                   |
| Charadriiformes   | Alcidae                        | stem           | 19                                     | 34                    | Smith (2015)                  |
| Charadriiformes   | Burhinidae                     |                | 37                                     | 23                    | Smith (2015)                  |
| Charadriiformes   | Jacaniidae                     | stem           | 30                                     | 30                    | Smith (2015)                  |
| Charadriiformes   | Laridae +Sternidae             | stem           | 22                                     | 24                    | Mlíkovský (2002); Mayr (2017) |
| Charadriiformes   | Pedionomidae                   | stem           | 23                                     | 24-26                 | De Pietri et al. (2015)       |
| Charadriiformes   | Turnicidae                     | stem           | 48                                     | 32-34                 | Mayr (2017)                   |
| Ciconiiformes     | Ciconiidae                     |                | 61                                     | 35                    | Miller et al. (1997)          |
| Coliiformes       | Coliidae                       | stem           | 63                                     | 56                    | Ksepka and Clarke (2015)      |
| Coraciiformes     | Coraciidae + Brachypteraciidae | stem           | 46                                     | 54                    | Bourdon et al. (2016)         |
| Coraciiformes     | Todidae                        | stem           | 45                                     | 35                    | Mlíkovský (2002); Mayr (2017) |
| Cuculiformes      | Cuculidae                      | stem           | 55                                     | 46-48                 | Mourer-Chauviré (2013)        |
| Falconiformes     | Polyborini                     |                | 28                                     | 5-11                  | Mayr (2017)                   |
| Falconiformes     | Falconidae                     |                | 9                                      | 11-15                 | Mayr (2017)                   |
| Falconiformes     | Herpetheriidae                 | stem           | 40                                     | 16-18                 | Mayr (2017)                   |
| Galliformes       | unknown                        | stem           | 63                                     | 67                    | Field et al., 2020            |
| Galliformes       | Phasianidae                    | stem           | 37                                     | 32-34                 | Mayr (2017)                   |
| Galliformes       | Megapodidae                    | stem           | 55                                     | 23-28                 | Mayr (2017)                   |
| Gaviiformes       | Gaviidae                       | stem           | 65                                     | 41-44                 | Mayr and Zvonok (2011)        |
| Gruiformes        | Gruidae                        | stem           | 25                                     | 16                    | Göhlich (2003); Mayr (2017)   |
| Gruiformes        | Rallidae                       | stem           | 33                                     | 32-34                 | Mayr (2017)                   |
| Gruiformes        | Heliornithidae                 |                | 33                                     | 11-15                 | Mayr (2017)                   |
| Leptosomiformes   | Leptosomidae                   | stem           | 63                                     | 51                    | Mayr (2017)                   |
| Musophagiformes   | Musophagidae                   |                | 13                                     | 32-34                 | Mayr (2017)                   |
| Opisthocomiformes | Opisthocomidae                 | stem           | 64                                     | 34                    | Mayr and De Pietri (2014)     |
| Otidiformes       | Otididae                       |                | 12                                     | 5                     | Mayr (2017)                   |
| Passeriformes     | unknown                        | stem           | 49                                     | 51                    | Mayr (2017)                   |
| Passeriformes     | Acanthisittidae                | stem           | 49                                     | 16-19                 | Worthy et al. (2010)          |
| Passeriformes     | sub-oscine families            | stem           | 37                                     | 32-34                 | Mayr (2017)                   |
| Passeriformes     | oscine-Families                |                | 40                                     | 32-34                 | Mayr (2017)                   |
| Pelecaniformes    | Pelecanidae                    | stem           | 33                                     | 28                    | Smith and Ksepka (2015)       |
| Pelecaniformes    | Threskiornithidae              | stem           | 56                                     | 54                    | Smith and Ksepka (2015)       |
| Phaethontiformes  | Phaethontidae                  | stem           | 62                                     | 56                    | Smith and Ksepka (2015)       |
| Piciformes        | Picidae                        |                | 19                                     | 23                    | Mayr (2017)                   |
| Podicipediformes  | Podicipedidae                  |                | 14                                     | 19                    | Mlíkovský (2002); Mayr (2017) |
| Procellariiformes | unknown                        | stem           | 62                                     | 65                    | Mayr (2017)                   |
| Procellariiformes | Diomedidae                     | stem           | 35                                     | 32-34                 | Mayr and Smith (2012)         |
| Procellariiformes | Hydrobatidae                   |                | 24                                     | 5-11                  | Mayr (2017)                   |
| Procellariiformes | Procellariidae                 |                | 30                                     | 41-33                 | Mayr (2017)                   |
| Psittaciformes    | unknown                        | stem           | 62                                     | 54                    | Ksepka and Clarke (2015)      |
| Psittaciformes    | Cacatuidae                     |                | 17                                     | 11-16                 | Boles (1993)                  |
| Psittaciformes    | Psittacidae                    |                | 29                                     | 20-23                 | Mayr (2017)                   |
| Psittaciformes    | Strigopidae                    | stem           | 44                                     | 16-19                 | Worthy et al. (2011)          |
| Pteroclitiformes  | Pteroclididae                  | stem           | 19                                     | 25                    | Mourer-Chauviré (1993)        |
| Sphenisciformes   | Spheniscidae                   | stem           | 62                                     | 61                    | Slack et al. (2006)           |
| Strigiformes      | unknown                        | stem           | 64                                     | 56-59                 | Mayr (2017)                   |
| Strigiformes      | Strigidae                      |                | 24                                     | 28-33                 | Mayr (2017)                   |
| Strigiformes      | Tytonidae                      |                | 20                                     | 15                    | Mayr (2017)                   |
| Struthioniformes  | Apterygidae                    |                | 12                                     | 16-19                 | Worthy et al. (2013)          |
| Struthioniformes  | Casuariidae + Dromaiinae       | stem           | 25                                     | 24                    | Mayr (2017)                   |
| Struthioniformes  | Struthionidae                  | stem           | 58                                     | 20                    | Mourer-Chauviré et al. (1996) |
| Struthioniformes  | Tinamidae                      |                | 27                                     | 16                    | Bertelli et al. (2014)        |
| Suliformes        | Phalacrocoracidae              |                | 24                                     | 25                    | Smith and Ksepka (2015)       |
| Suliformes        | Anhingidae                     | stem           | 24                                     | 24-26                 | Worthy (2012)                 |
| Suliformes        | Fregatidae                     | stem           | 49                                     | 52                    | Smith and Ksepka (2015)       |
| Trogoniformes     | Trogonidae                     | stem           | 61                                     | 54                    | Kristoffersen (2002)          |

## References

- Bertelli S, Chiappe LM, Mayr G. 2014. Phylogenetic interrelationships of living and extinct Tinamidae, volant palaeognathous birds from the New World. *Zoological Journal of the Linnean Society*, 172, 145-184.
- Boles WE. 1993. A new cockatoo (Psittaciformes: Cacatuidae) from the Tertiary of Riversleigh, northwestern Queensland, and an evaluation of rostral characters in the systematics of parrots. *Ibis*, 135(1), 8-18.
- Kristoffersen AV. 2002. An early Paleogene trogon (Aves: Trogoniformes) from the Fur Formation, Denmark. *Journal of vertebrate Paleontology*, 22(3), 661-666.
- Bourdon E, Kristoffersen AV, Bonde N. 2016. A roller-like bird (Coraciidae) from the Early Eocene of Denmark. *Scientific reports*, 6, 34050.
- De Pietri VL, Mayr G. 2014. Reappraisal of early Miocene rails (Aves, Rallidae) from central France: diversity and character evolution. *Journal of Zoological Systematics and Evolutionary Research*, 52, 312-322.
- De Pietri VL, Camens AB, Worthy TH. 2015. A Plains-wanderer (Pedionomidae) that did not wander plains: a new species from the Oligocene of South Australia. *Ibis* 157: 68-74.
- Field DJ, Benito J, Chen A, Jagt JW, Ksepka DT. 2020. Late Cretaceous neornithine from Europe illuminates the origins of crown birds. *Nature* 579: 397-401.
- Göhlich U B. 2003. A new crane (Aves: Gruidae) from the Miocene of Germany. *Journal of Vertebrate Paleontology*, 23(2), 387-393.
- Ksepka DT, Clarke J. 2015. Phylogenetically vetted and stratigraphically constrained fossil calibrations within Aves. *Palaeontol Electronica* 18(3FC): 1-25.
- Mayr G. 2004. Old World fossil record of modern-type hummingbirds. *Science*, 304(5672), 861-864.
- Mayr G. 2017. *Avian evolution: the fossil record of birds and its paleobiological significance*. John Wiley & Sons, Chichester.
- Mayr G, Smith T. 2012. A fossil albatross from the early Oligocene of the North Sea Basin. *Auk* 129: 87-95.
- Mayr G, Zvonok E. 2011. Middle Eocene Pelagornithidae and Gaviiformes (Aves) from the Ukrainian Paratethys. *Palaeontology*, 54(6), 1347-1359.
- Miller ER, Rasmussen DT, Simons EL. 1997. Fossil storks (Ciconiidae) from the late Eocene and early Miocene of Egypt. *Ostrich*, 68(1), 23-26.
- Mlíkovský J. 2002. *Cenozoic birds of the world. 1. Europe*. Ninox Press, Praha.
- Mourer-Chauviré C. 1993. Les gangas (Aves, Columbiformes, Pteroclididae) du Paléogène et du Miocène inférieur de France. *Palaeovertebrata*, 22, 73-98.
- Mourer-Chauviré C., Tabuce R, Essid EM, Marivaux L, Khayati H, Vianey-Liaud M, Ali MBH. 2013. A new taxon of stem group Galliformes and the earliest record for stem group Cuculidae from the Eocene of Djebel Chambi, Tunisia. In *Proceedings of the 8th international meeting of the Society of Avian Paleontology and Evolution Proc. R. Soc. B* (Vol. 281, No. 20140765, p. 9).
- Mourer-Chauviré C, Senut B, Pickford M, Mein P. 1996. Le plus ancien représentant du genre *Struthio* (Aves, Struthionidae), *Struthio coppensi* n. sp., du Miocène inférieur de Namibie. *Comptes rendus de l'Académie des sciences. Série 2. Sciences de la terre et des planètes*, 322(4), 325-332.
- Slack KE, Jones CM, Ando T, Harrison GL, Fordyce RE, Arnason U, Penny D. 2006. Early penguin fossils, plus mitochondrial genomes, calibrate avian evolution. *Mol Biol Evol* 23: 1144-1155.
- Smith ND, Ksepka DT. 2015. Five well-supported fossil calibrations within the 'Waterbird' assemblage (Tetrapoda, Aves). *Palaeontol Electronica* 18: 1-21.
- Smith NA. 2015. Sixteen vetted fossil calibrations for divergence dating of Charadriiformes (Aves, Neognathae). *Palaeontol Electronica* 18: 1-18.
- Worthy TH. 2012. A new species of Oligo-Miocene darter (Aves: Anhingidae) from Australia. *The Auk*, 129(1), 96-104.
- Worthy TH, Scanlon JD. 2009. An Oligo-Miocene magpie goose (Aves: Anseranatidae) from Riversleigh, Northwestern Queensland, Australia. *Journal of Vertebrate Paleontology*, 29, 205-211.
- Worthy TH, Hand SJ, Nguyen JMT, Tennyson AJD, Worthy JP, Scofield RP, Boles WE, Archer M. 2010. Biogeographical and phylogenetic implications of an early Miocene wren (Aves: Passeriformes: Acanthisittidae) from New Zealand. *Journal of Vertebrate Paleontology*, 30, 479-498.
- Worthy TH, Tennyson AJ, Scofield RP. 2011. An early Miocene diversity of parrots (Aves, Strigopidae, Nestorinae) from New Zealand. *Journal of Vertebrate Paleontology*, 31, 1102-1116.
- Worthy T, Worthy JP, Tennyson A J, Salisbury SW, Hand S J, Scofield RP. 2013. Miocene fossils show that kiwi (Apteryx, Apterygidae) are probably not phyletic dwarves. In: U.B. Göhlich & A. Kroh (eds.), *Paleornithological Research 2013 - Proceedings of the 8th International Meeting of the Society of Avian Paleontology and Evolution*. Vienna: Natural History Museum Vienna, pp. 63-80.

# Tab. S5

| Family-level taxon | Order-level taxon | References                                                                                                                                                                                                                                                                             |
|--------------------|-------------------|----------------------------------------------------------------------------------------------------------------------------------------------------------------------------------------------------------------------------------------------------------------------------------------|
| Acanthizidae       | Passeriformes     | Gill F, Donsker D. 2017. IOC World Bird List (v 7.3). doi: 10.14344/IOC. ML72.                                                                                                                                                                                                         |
| Acrocephalidae     | Passeriformes     | Atkin K, Townsend AD. 1965. On the problems of separating Reed and Marsh Warblers: mimicry in song of Reed Warbler. <i>Brit Birds</i> 58:181-182.                                                                                                                                      |
| Aegithinidae       | Passeriformes     | Bharos AMK. 1998. Mimicry by common iora <i>Aegithina tiphia</i> . <i>J Bombay Nat Hist Soc</i> 95(1):116.                                                                                                                                                                             |
| Alaudidae          | Passeriformes     | Dowsett-Lemaire F, Dowsett, RJ. 1978. Vocal mimicry in the lark <i>Mirafra hypermetra</i> as a possible species-isolating mechanism. <i>Bull Brit Ornithol Club</i> 98:140-144.                                                                                                        |
| Artamidae          | Passeriformes     | Kaplan G. 1999. Song Structure and Function of Mimicry in the Australian Magpie ( <i>Gymnorhina tibicen</i> ): Compared to Lyrebird ( <i>Menura ssp.</i> ). <i>Int J Comp Psychol</i> 12(4):                                                                                           |
| Bombycillidae      | Passeriformes     | Chu M. 2001. Heterospecific responses to scream calls and vocal mimicry by phainopeplas ( <i>Phainopepla nitens</i> ) in distress. <i>Behaviour</i> 138(6):775-787.                                                                                                                    |
| Campephagidae      | Passeriformes     | Diamond JM. 2002. Dispersal, mimicry, and geographic variations in northern Melanesian birds. <i>Pac Sci</i> 56(1):1-22.                                                                                                                                                               |
| Cardinalidae       | Passeriformes     | Yamaguchi A. 2001. Sex differences in vocal learning in birds. <i>Nature</i> 411:257.                                                                                                                                                                                                  |
| Certhiidae         | Passeriformes     | Thielcke G. 1972. Die Lautbaumläufer ( <i>Certhia familiaris</i> ) ahmen artfremdes Signal nach und reagieren darauf. <i>J Ornithol</i> 113(3):287-296.                                                                                                                                |
| Cettidae           | Passeriformes     | Cramp SP, Perrins CM, Brooks, DJ (Eds) 1994. Handbook of the Birds of Europe the Middle East and North Africa: The Birds of the Western Palearctic. Oxford University Press                                                                                                            |
| Chloropseidae      | Passeriformes     | Aitken EH. 1887. On the mimicry shown by <i>Phyllornis jerdoni</i> . <i>J Bombay Nat Hist Soc</i> 1(1):25.                                                                                                                                                                             |
| Cisticolidae       | Passeriformes     | Nuttall RJ. 2000. Vocal mimicry in individual Thick-billed Lark <i>Galerida magnirostris</i> and Yellow-bellied Eremomela <i>Eremomela icteropygialis</i> . <i>Mirafra</i> 17:56-57.                                                                                                   |
| Coerebidae         | Passeriformes     | Gill F, Donsker D. 2017. IOC World Bird List (v 7.3). doi: 10.14344/IOC. ML72.                                                                                                                                                                                                         |
| Corvidae           | Passeriformes     | Lorenz K. 1931. Beiträge zur Ethologie sozialer Corviden. <i>J Ornithol</i> 79:67-127.                                                                                                                                                                                                 |
| Dicaeidae          | Passeriformes     | Close DH. 1991. Mimicry by Mistletoebird. <i>S Aust Ornithol</i> 31(3):74.                                                                                                                                                                                                             |
| Dicruridae         | Passeriformes     | Jamie GA, de Silva Wijeyratne G. 2016. Mimicry of Sri Lanka Crested Drongo <i>Dicrurus lophorinus</i> by Fork-tailed Drongo Cuckoo <i>Surniculus dicruroides</i> . <i>Bird Asia</i> 25:82-83.                                                                                          |
| Emberizidae        | Passeriformes     | Wonke G, Walschläger D. 2009. Song dialects in the yellowhammer <i>Emberiza citrinella</i> : bioacoustic variation between and within dialects. <i>J Ornithol</i> 150:117-126.                                                                                                         |
| Estrilidae         | Passeriformes     | Slater PJ, Eales LA, Clayton N. 1988. Song learning in zebra finches ( <i>Taeniopygia guttata</i> ): progress and prospects.In: <i>Advances in the Study of Behavior: Elsevier</i> . p. 1-34.                                                                                          |
| Fringillidae       | Passeriformes     | Lachlan RF, Slater P. 2003. Song learning by chaffinches: how accurate, and from where? <i>Anim Behav</i> 65(5):957-969.                                                                                                                                                               |
| Icteridae          | Passeriformes     | Goller M, Shizuka D. 2018. Evolutionary origins of vocal mimicry in songbirds. <i>Evol Lett</i> 2(4):417-426.                                                                                                                                                                          |
| Irenidae           | Passeriformes     | Hartshorne C. 1973. Born to sing: an interpretation and world survey of bird song. A Midland Book. Indiana University Press.                                                                                                                                                           |
| Laniidae           | Passeriformes     | Blasé B. 1960. Die Lautäußerungen des Neuntötters ( <i>Lanius c. collurio</i> L.), Freilandbeobachtungen und Kaspar-Hauser-Versuche. <i>Z Tierpsychol</i> 17:293-344.                                                                                                                  |
| Leiothrichidae     | Passeriformes     | Goller M, Shizuka D. 2018. Evolutionary origins of vocal mimicry in songbirds. <i>Evol Lett</i> 2(4):417-426.                                                                                                                                                                          |
| Locustellidae      | Passeriformes     | Cramp SP, Perrins CM, Brooks, DJ (Eds) 1994. Handbook of the Birds of Europe the Middle East and North Africa: The Birds of the Western Palearctic. Oxford University Press                                                                                                            |
| Macrosphenidae     | Passeriformes     | Goller M, Shizuka D. 2018. Evolutionary origins of vocal mimicry in songbirds. <i>Evol Lett</i> 2(4):417-426.                                                                                                                                                                          |
| Malaconotidae      | Passeriformes     | Wickler W. 1972. Aufbau und Paarspezifität des Gesangsduettes von <i>Laniarius funebris</i> (Aves, Passeriformes, Laniidae). <i>Z Tierpsychol</i> 30:464-476.                                                                                                                          |
| Maluridae          | Passeriformes     | Higgins PJ, Peter JM, Cowling SJ (Eds.). 2006. Handbook of Australian, New Zealand and Antarctic Birds. Melbourne: Oxford University Press.                                                                                                                                            |
| Meliphagidae       | Passeriformes     | Veerman PA. 1994. Batesian acoustic mimicry by the Regent Honeyeater <i>Xanthomyza phrygia</i> . <i>Aust Bird Watcher</i> 15(6):250-259.                                                                                                                                               |
| Menuridae          | Passeriformes     | Dalziel AH, Magrath RD. 2012. Fooling the experts: accurate vocal mimicry in the song of the superb lyrebird, <i>Menura novaehollandiae</i> . <i>Anim Behav</i> 83(6):1401-1410.                                                                                                       |
| Mimidae            | Passeriformes     | O'Loghlin AL, Rothstein SI. 2002. Ecological effects on song learning: delayed development is widespread in wild populations of brown-headed cowbirds. <i>Anim Behav</i> 63:475-486.                                                                                                   |
| Monarchidae        | Passeriformes     | Gill F, Donsker D. 2017. IOC World Bird List (v 7.3). doi: 10.14344/IOC. ML72.                                                                                                                                                                                                         |
| Motacillidae       | Passeriformes     | Walschläger D. 1984. A bioacoustical contribution to the systematics of the Palearctic Motacillidae. II. Songs and call-notes of the genus <i>Anthus</i> . <i>Mitt Zool Mus Berlin</i> 60:37-56.                                                                                       |
| Muscicapidae       | Passeriformes     | Hughes M, Hultsch H, Todt D. 2002. Imitation and invention in song learning in nightingales ( <i>Luscinia megarhynchos</i> B., Turdidae). <i>Ethology</i> 108:97-113.                                                                                                                  |
| Nectariniidae      | Passeriformes     | Grimes L. 1974. Dialects and geographical variation in the song of the splendid sunbird <i>Nectarinia coccinigeraster</i> . <i>Ibis</i> 116(3):314-329.                                                                                                                                |
| Nicatoridae        | Passeriformes     | Gill F, Donsker D. 2017. IOC World Bird List (v 7.3). doi: 10.14344/IOC. ML72.                                                                                                                                                                                                         |
| Oriolidae          | Passeriformes     | Béland P. 1977. Mimicry in orioles of south-eastern Queensland. <i>Emu</i> 77(4):215-218.                                                                                                                                                                                              |
| Orthonychidae      | Passeriformes     | McGuire M. 1996. Dialects of the chowchilla <i>Orthonyx spaldingii</i> in upland rainforest of north-eastern Australia. <i>Emu</i> 96(3):174-180.                                                                                                                                      |
| Pachycephalidae    | Passeriformes     | Armstrong EA. 1963. A study of bird song. London: Oxford University Press.                                                                                                                                                                                                             |
| Paridae            | Passeriformes     | McGregor PK, Krebs JR. 1989. Song learning in adult great tits ( <i>Parus major</i> ): effects of neighbours. <i>Behaviour</i> 108(1-2):139-159.                                                                                                                                       |
| Parulidae          | Passeriformes     | Kroodsma DE, Meservey WR, Pickert R. 1983. Vocal learning in the Parulinae. <i>Wilson Bull</i> 138-140.                                                                                                                                                                                |
| Passerellidae      | Passeriformes     | Konishi M. 1965. The role of auditory feedback in the control of vocalization in the white-crowned sparrow. <i>Z Tierpsychol</i> 22(7):770-783.                                                                                                                                        |
| Passeridae         | Passeriformes     | Wickler W. 1982. Immanuel Kant and the Song of the House Sparrow. <i>Auk</i> 99(3):590-591.                                                                                                                                                                                            |
| Phylloscopidae     | Passeriformes     | Thielcke G, Linsenmair KE. 1963. Zur geographischen Variation des Gesanges des Zilzalps, <i>Phylloscopus collybita</i> , in Mittel- und Südwesteuropa mit einem Vergleich des Gesanges des Fitis, <i>Phylloscopus trochilus</i> . <i>J Ornithol</i> 104:372-402.                       |
| Platysteiridae     | Passeriformes     | Goller M, Shizuka D. 2018. Evolutionary origins of vocal mimicry in songbirds. <i>Evol Lett</i> 2(4):417-426.                                                                                                                                                                          |
| Ploceidae          | Passeriformes     | Wickler W, Kleindienst HU, Sonnenschein E, Seibt U. 2002. Structure, geography and origin of dialects in the traditive song of the forest weaver <i>Ploceus bicolor sclateri</i> in Natal, S. Africa. <i>Behaviour</i> 139:1237-1265.                                                  |
| Poliptilidae       | Passeriformes     | Gill F, Donsker D. 2017. IOC World Bird List (v 7.3). doi: 10.14344/IOC. ML72.                                                                                                                                                                                                         |
| Prunellidae        | Passeriformes     | Cramp SP, Perrins CM, Brooks, DJ (Eds) 1994. Handbook of the Birds of Europe the Middle East and North Africa: The Birds of the Western Palearctic. Oxford University Press                                                                                                            |
| Psophodidae        | Passeriformes     | Diamond JM. 2002. Dispersal, mimicry, and geographic variations in northern Melanesian birds. <i>Pac Sci</i> 56(1):1-22.                                                                                                                                                               |
| Ptilgonatidae      | Passeriformes     | Chu M. 2001. Heterospecific responses to scream calls and vocal mimicry by phainopeplas ( <i>Phainopepla nitens</i> ) in distress. <i>Behaviour</i> 138(6):775-787.                                                                                                                    |
| Ptilonorhynchidae  | Passeriformes     | Frith CB, McGuire M. 1996. Visual evidence of vocal avian mimicry by male tooth-billed bowerbirds <i>Scenopoetes dentirostris</i> ( <i>Ptilonorhynchidae</i> ). <i>Emu</i> 96:12-16.                                                                                                   |
| Pycnonotidae       | Passeriformes     | Reichenow A. 1905. Die Vögel Afrikas: J. Neumann.                                                                                                                                                                                                                                      |
| Regulidae          | Passeriformes     | Päckert M, Martens J. 2004. Song dialects on the Atlantic islands: goldcrests of the Azores ( <i>Regulus regulus azoricus</i> , R. r. <i>sanctae-mariae</i> , R. r. <i>inermis</i> ). <i>J Ornithol</i> 145:23-30                                                                      |
| Stenotiridae       | Passeriformes     | Wood AJ. 1993. Bushveld Pipits explained. <i>Honeyguide</i> 39(4):198.                                                                                                                                                                                                                 |
| Sturnidae          | Passeriformes     | Eens M, Pinxten R, Verheyen RF. 1992. Song learning in captive European starlings, <i>Sturnus vulgaris</i> . <i>Anim Behav</i> 44(6):1131-1143.                                                                                                                                        |
| Sylvidae           | Passeriformes     | Bergmann H-H. 1973. Die Imitationsleistung einer Mischsänger-Dorngrasmücke ( <i>Sylvia communis</i> ). <i>J Ornithol</i> 114(3):317-338.                                                                                                                                               |
| Thraupidae         | Passeriformes     | Willis EO. 1976. Similarity of a tanager ( <i>Orchestic abeillei</i> ) and an Ovenbird ( <i>Philydor rufus</i> ): A possible case of mimicry. <i>Ciência e Cultura</i> 28:1492-1493.                                                                                                   |
| Timaliidae         | Passeriformes     | Gill F, Donsker D. 2017. IOC World Bird List (v 7.3). doi: 10.14344/IOC. ML72.                                                                                                                                                                                                         |
| Troglodytidae      | Passeriformes     | Kroodsma DE. 1974. Song learning, dialects, and dispersal in the Bewick's wren. <i>Z Tierpsychol</i> 35(4):352-380.                                                                                                                                                                    |
| Turdidae           | Passeriformes     | Tretzel E. 1967. Imitation und Transposition menschlicher Pfiffe durch Amseln ( <i>Turdus m. meruli</i> L.): Ein weiterer Nachweis relativen Lernens und akustischer Abstraktion bei Vögeln. <i>Z Tierpsychol</i> 24(2):137-161.                                                       |
| Vangidae           | Passeriformes     | Gill F, Donsker D. 2017. IOC World Bird List (v 7.3). doi: 10.14344/IOC. ML72.                                                                                                                                                                                                         |
| Viduidae           | Passeriformes     | Payne RB. 1973. Vocal mimicry of the parasite whydahs ( <i>Vidua</i> ) and response of female whydahs to the songs of their hosts ( <i>Ptyilia</i> ) and their mimics. <i>Anim Behav</i> 21:762-771.                                                                                   |
| Vireonidae         | Passeriformes     | Morton ES, Howlett J, Kopysh NC, Chiver I. 2006. Song ranging by incubating male Blue-headed Vireos: the importance of song representation in repertoires and implications for song delivery patterns and local/foreign dialect discrimination. <i>J Field Ornithol</i> 77(3):291-301. |
| Zosteropidae       | Passeriformes     | Guest SJ. 1973b. White-eye vocal mimicry. <i>Elepaio</i> 34:3-4.                                                                                                                                                                                                                       |
| Trochilidae        | Apodiformes       | Baptista LF, Schuchmann, K-L. 1990. Song Learning in the Anna Hummingbird ( <i>Calypte anna</i> ). <i>Ethology</i> 84 (1):15-26.                                                                                                                                                       |
| Psittacidae        | Psittaciformes    | Cruickshank AJ, Gautier JP, Chappuis, C. 1993. Vocal mimicry in wild African Grey Parrots <i>Psittacus erithacus</i> . <i>Ibis</i> 135(3):293-299.                                                                                                                                     |
| Cacatuidae         | Psittaciformes    | Walløe S, Thomsen H, Balsby TJ, Dabelsteen T. 2015. Differences in short-term vocal learning in parrots, a comparative study. <i>Behaviour</i> 152(11):1433-1461.                                                                                                                      |
| Strigopidae        | Psittaciformes    | Wein A, Schwing R, Hausberger M, Rodriguez R, Huber L. 2018. Vocal conditioning in kea parrots ( <i>Nestor notabilis</i> ). <i>J Comp Psychol</i> 132(1):97.                                                                                                                           |

# Tab. S6

| family-level taxon | references                                                                                                                                                                                                                                                               |
|--------------------|--------------------------------------------------------------------------------------------------------------------------------------------------------------------------------------------------------------------------------------------------------------------------|
| Acanthizidae       | Gahr, unpublished data                                                                                                                                                                                                                                                   |
| Acrocephalidae     | Gahr, unpublished data                                                                                                                                                                                                                                                   |
| Aegithalidae       | Moore JM, Székely T, Büki J, DeVoogd TJ. 2011. Motor pathway convergence predicts syllable repertoire size in oscine birds. <i>Proc Natl Acad Sci</i> 108:16440-16445.                                                                                                   |
| Alaudidae          | Gahr, unpublished data                                                                                                                                                                                                                                                   |
| Artamidae          | Deng C, Kaplan G, Rogers LJ. 2001. Similarity of the song nuclei of male and female Australian magpies ( <i>Gymnorhina tibicen</i> ). <i>Behav Brain Res.</i> 123:89-102                                                                                                 |
| Cardinalidae       | Jawor JM, Macdougall-Shackleton SA. 2008. Seasonal and sex-related variation in song control nuclei in a species with near-monomorphic song, the northern cardinal. <i>Neurosci Lett</i> 443:169-173.                                                                    |
| Certhiidae         | Devoogd TJ, Krebs JR, Healy SD, Purvis A. 1993. Relations between song repertoire size and the volume of brain nuclei related to song: comparative evolutionary analyses amongst oscine birds. <i>Proc Royal Soc London B Biol Sci</i> 254:75-82.                        |
| Cinclidae          | Gahr, unpublished data                                                                                                                                                                                                                                                   |
| Cisticolidae       | Gahr, unpublished data                                                                                                                                                                                                                                                   |
| Corvidae           | Wang R, Sun Y, Zhang X, Zeng S, Xie W, Yu Y, Zhang X, Zuo M. 2009. Song control nuclei in male and female large-billed crows ( <i>Corvus macrorhynchos</i> ). <i>Zoolog Sci</i> 26:771-                                                                                  |
| Dicruridae         | Gahr, unpublished data                                                                                                                                                                                                                                                   |
| Emberizidae        | Zhao J, Jiang J, Li D. 2003. Control pattern of vocal center for vocalization in ruddy bunting ( <i>Emberiza rutila</i> ). <i>Sci China C Life Sci</i> 46:615-622.                                                                                                       |
| Estrilidae         | Gahr M, Guettinger HR, Kroodsmma DE. 1993. Estrogen receptors in the avian brain: survey reveals general distribution and forebrain areas unique to songbirds. <i>J Comp Neurol</i> 327:112-122.                                                                         |
| Fringillidae       | Lucke J, Haase E. 1980. Autoradiography of the brain of bramblings ( <i>Fringilla montifringilla</i> L.) following the injection of 3H-testosterone. <i>J Hirnforsch</i> 21:369-380.                                                                                     |
| Hirundinidae       | Moore JM, Székely T, Büki J, DeVoogd TJ. 2011. Motor pathway convergence predicts syllable repertoire size in oscine birds. <i>Proc Natl Acad Sci</i> 108:16440-16445.                                                                                                   |
| Icteridae          | Hauber ME, Clayton NS, Kacelnik A, Reboreda JC, DeVoogd TJ. 1999. Sexual dimorphism and species differences in HVC volumes of cowbirds. <i>Behav Neurosci</i> 113:1095-                                                                                                  |
| Laniidae           | Moore JM, Székely T, Büki J, DeVoogd TJ. 2011. Motor pathway convergence predicts syllable repertoire size in oscine birds. <i>Proc Natl Acad Sci</i> 108:16440-16445.                                                                                                   |
| Leiothrichidae     | Gahr, unpublished data                                                                                                                                                                                                                                                   |
| Locustellidae      | Moore JM, Székely T, Büki J, DeVoogd TJ. 2011. Motor pathway convergence predicts syllable repertoire size in oscine birds. <i>Proc Natl Acad Sci</i> 108:16440-16445.                                                                                                   |
| Malaconotidae      | Gahr M, Sonnenschein E, Wickler W. 1998. Sex difference in the size of the neural song control regions in a duetting songbird with similar song repertoire size of males and females. <i>J Neurosci</i> 18:1124-1131.                                                    |
| Maluridae          | Schwabl H, Dowling J, Baldassarre DT, Gahr M, Lindsay WR, Webster MS. 2015. Variation in song system anatomy and androgen levels does not correspond to song characteristics in a tropical songbird. <i>Animal Behav</i> 104: 39-50.                                     |
| Mimidae            | McCasland JS. 1987. Neuronal control of bird song production. <i>J Neurosci</i> 7:23-39.                                                                                                                                                                                 |
| Motacillidae       | Moore JM, Székely T, Büki J, DeVoogd TJ. 2011. Motor pathway convergence predicts syllable repertoire size in oscine birds. <i>Proc Natl Acad Sci</i> 108:16440-16445.                                                                                                   |
| Muscicapidae       | Dittrich F, Ramenda C, Grillitsch D, Frankl-Vilches C, Ko MC, Hertel M, Goymann W, ter Maat A, Gahr M. 2014. Regulatory mechanisms of testosterone-stimulated song in the sensorimotor nucleus HVC of female songbirds. <i>BMC Neurosci</i> 15:128.                      |
| Panuridae          | Moore JM, Székely T, Büki J, DeVoogd TJ. 2011. Motor pathway convergence predicts syllable repertoire size in oscine birds. <i>Proc Natl Acad Sci</i> 108:16440-16445.                                                                                                   |
| Paridae            | Gahr M, Guettinger HR, Kroodsmma DE. 1993. Estrogen receptors in the avian brain: survey reveals general distribution and forebrain areas unique to songbirds. <i>J Comp Neurol</i> 327:112-122.                                                                         |
| Parulidae          | Moore JM, Székely T, Büki J, DeVoogd TJ. 2011. Motor pathway convergence predicts syllable repertoire size in oscine birds. <i>Proc Natl Acad Sci</i> 108:16440-16445.                                                                                                   |
| Passerellidae      | Baker MC, Bottjer SW, Arnold AP. 1984. Sexual dimorphism and lack of seasonal changes in vocal control regions of the white-crowned sparrow brain. <i>Brain Res</i>                                                                                                      |
| Passeridae         | Gahr M, Guettinger HR, Kroodsmma DE. 1993. Estrogen receptors in the avian brain: survey reveals general distribution and forebrain areas unique to songbirds. <i>J Comp Neurol</i> 327:112-122.                                                                         |
| Phylloscopidae     | Gahr, unpublished data                                                                                                                                                                                                                                                   |
| Ploceidae          | Gahr M, Metzdorf R, Schmidl D, Wickler W. 2008. Bi-directional sexual dimorphisms of the song control nucleus HVC in a songbird with unison song. <i>PLoS One</i>                                                                                                        |
| Prunellidae        | Devoogd TJ, Krebs JR, Healy SD, Purvis A. 1993. Relations between song repertoire size and the volume of brain nuclei related to song: comparative evolutionary analyses amongst oscine birds. <i>Proc Royal Soc London B Biol Sci</i> 254(1340):75-82.                  |
| Pycnonotidae       | Gahr, unpublished data                                                                                                                                                                                                                                                   |
| Regulidae          | Gahr, unpublished data                                                                                                                                                                                                                                                   |
| Remizidae          | Gahr, unpublished data                                                                                                                                                                                                                                                   |
| Sittidae           | Gahr, unpublished data                                                                                                                                                                                                                                                   |
| Sturnidae          | Gahr M, Guettinger HR, Kroodsmma DE. 1993. Estrogen receptors in the avian brain: survey reveals general distribution and forebrain areas unique to songbirds. <i>J Comp Neurol</i> 327:112-122.                                                                         |
| Sylviidae          | Moore JM, Székely T, Büki J, DeVoogd TJ. 2011. Motor pathway convergence predicts syllable repertoire size in oscine birds. <i>Proc Natl Acad Sci</i> 108:16440-16445.                                                                                                   |
| Thraupidae         | Quispe R, Sebe F, da Silva ML, Gahr M. 2016. Dawn-song onset coincides with increased HVC androgen receptor expression but is decoupled from high circulating testosterone in an equatorial songbird. <i>Physiol Behav</i> 156:1-7.                                      |
| Timaliidae         | Gahr, unpublished data                                                                                                                                                                                                                                                   |
| Troglodytidae      | Brenowitz EA, Arnold AP. 1986. Interspecific comparisons of the size of neural song control regions and song complexity in duetting birds: evolutionary implications. <i>J Neurosci</i> 6:2875-2879.                                                                     |
| Turdidae           | Lorena J, Olson CR, Fontana CS, Mello CV, Schneider MPC, Schneider PN. 2019. Seasonal changes in the song control nuclei of the Rufous-bellied Thrush, <i>Turdus rufiventris</i> (Oscine, Passeriformes, and Turdidae). <i>J Exp Zool B Mol Dev Evol</i> 332(3-4):92-98. |
| Viduidae           | Gahr, unpublished data                                                                                                                                                                                                                                                   |
| Zosteropidae       | Gahr, unpublished data                                                                                                                                                                                                                                                   |
